# Supplementary material for: Fast RNA conjugations on solid phase by strain-promoted cycloadditions
Source: Royal Society of Chemistry journal article supplement (doi:10.1039/c2ob25628b), 2012-01-01
Supplement: c2ob25628b.pdf [file c2ob25628b.pdf]

## Supporting Information

### **Fast RNA Conjugations on Solid Phase by Strain-Promoted Cycloadditions**

**Ishwar Singh,\* Colin Freeman, Annemieke Madder, Joseph S. Vyle and Frances Heaney\***

#### **Table of contents**

|                   |         |
|-------------------|---------|
| HPLC Data         | S2-S13  |
| MALDI-TOF MS data | S14-S36 |

### HPLC Traces

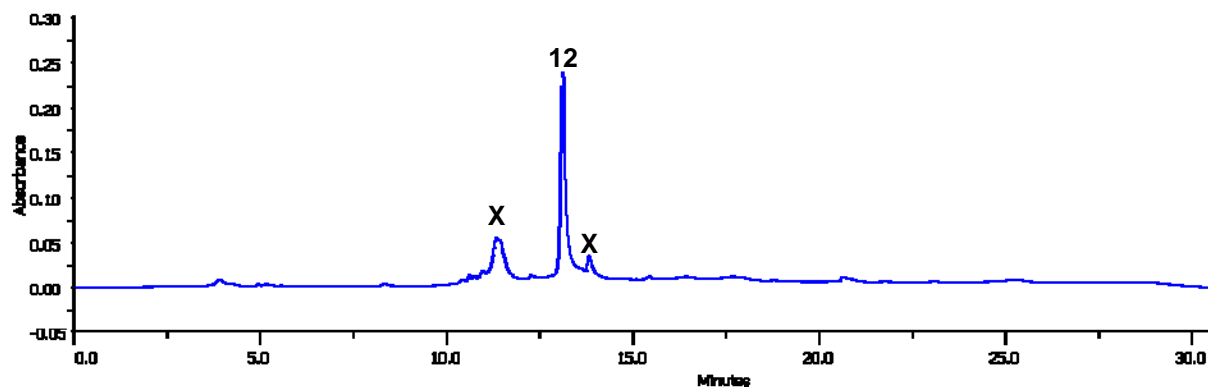

**Figure 1** Reversed-phase HPLC trace of crude **12** (19-mer RNA-cyclooctyne)

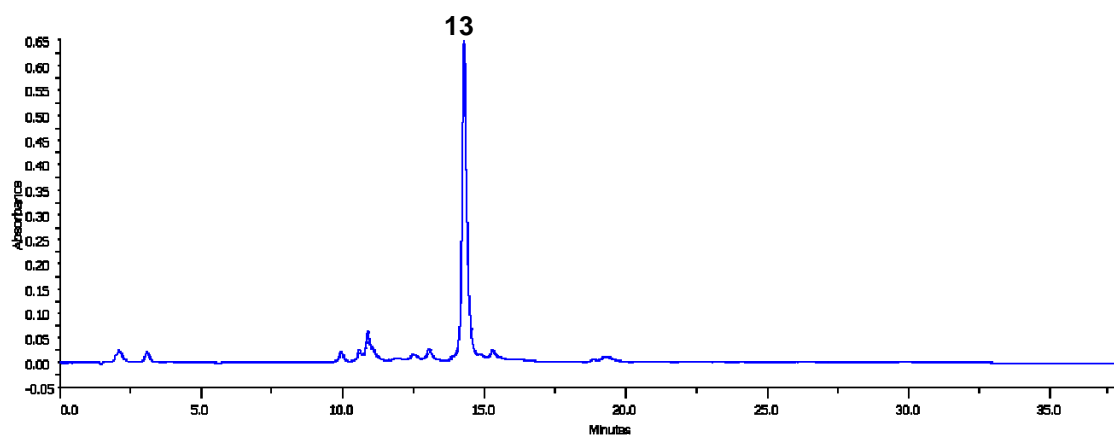

**Figure 2** Reversed-phase HPLC trace of crude **13** (U<sub>4</sub>-cyclooctyne)

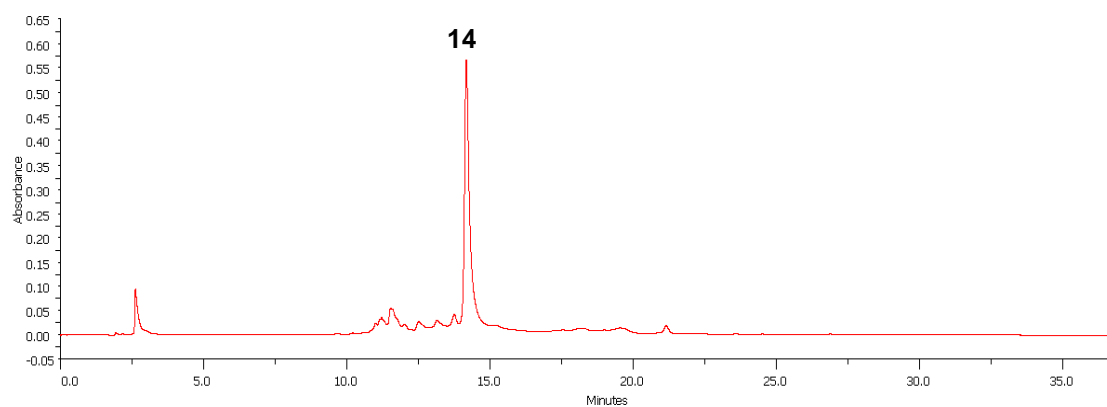

**Figure 3** Reversed-phase HPLC trace of crude **14** (9-mer RNA-cyclooctyne)

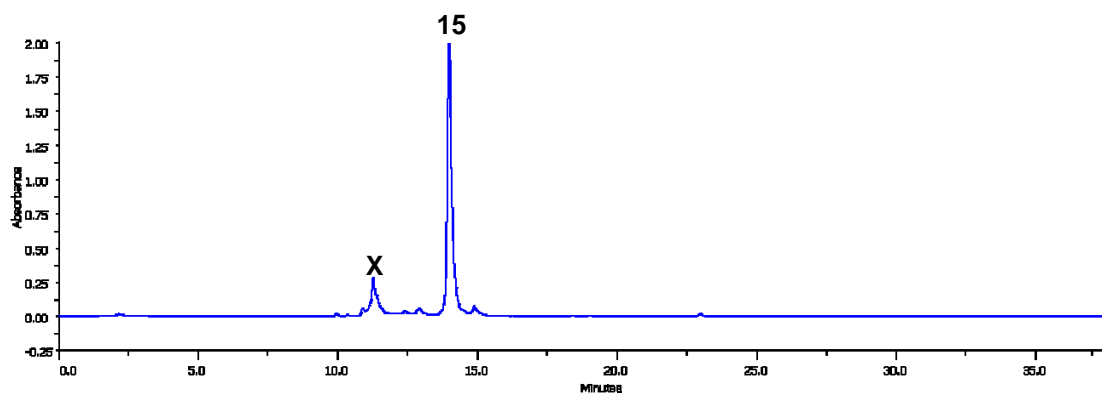

**Figure 4** Reversed-phase HPLC trace of crude **15** (U<sub>6</sub>-alternate RNA-cyclooctyne)

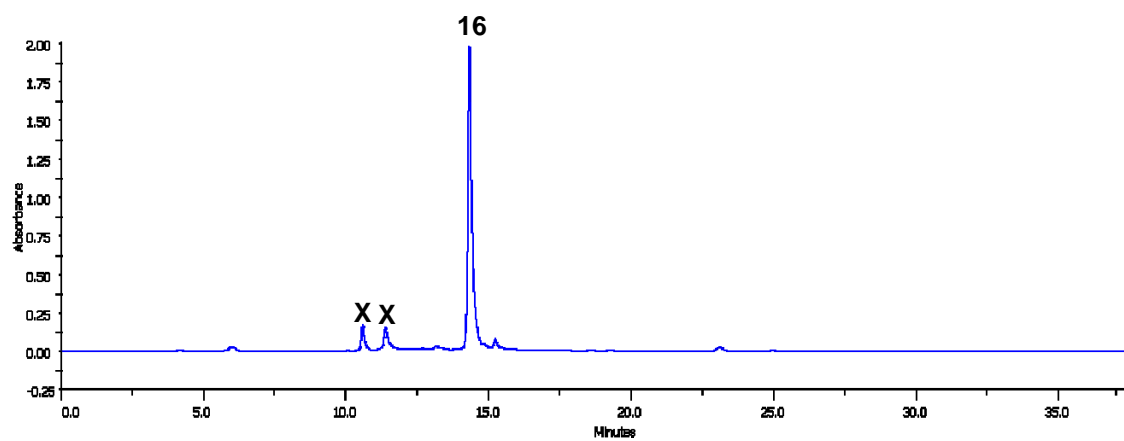

**Figure 5** Reversed-phase HPLC trace of crude **16** (gapmer RNA-cyclooctyne)

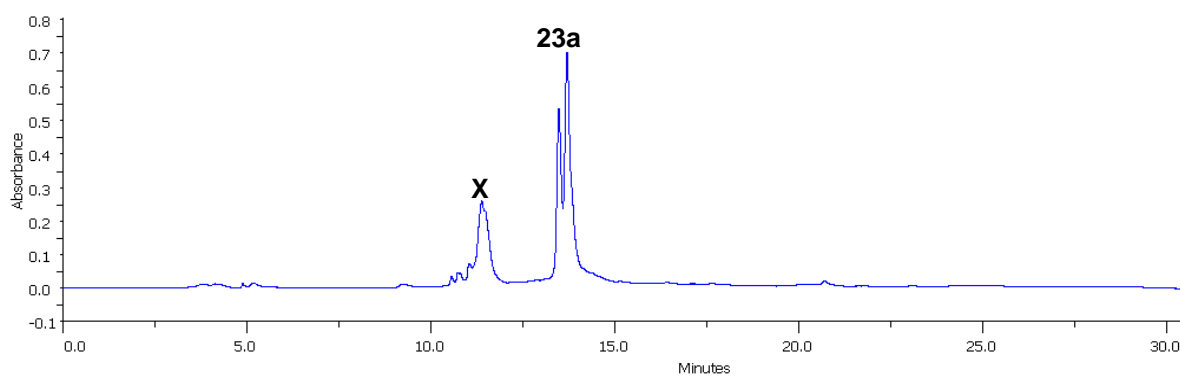

**Figure 6** Reversed-phase HPLC trace of crude **23a** (19-mer RNA benzyl triazole conjugate)

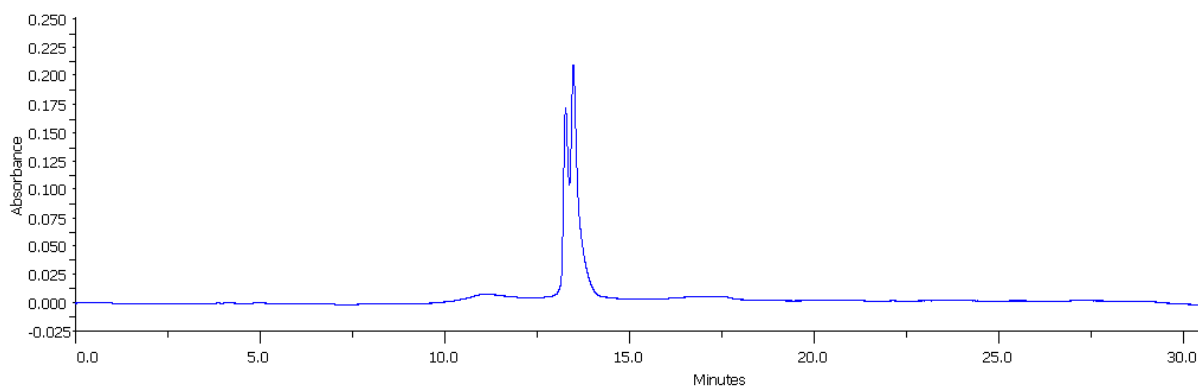

**Figure 7** Reversed-phase HPLC trace of pure **23a** (19-mer RNA benzyl triazole conjugate)

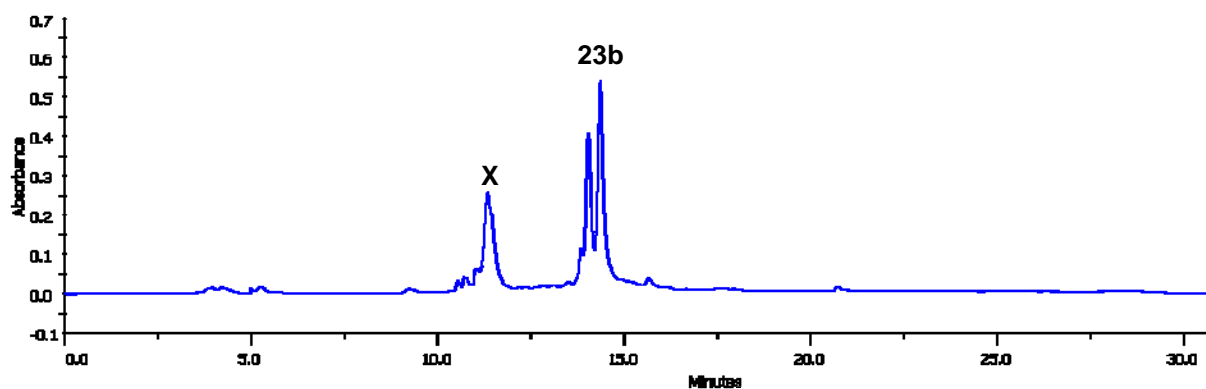

**Figure 8** Reversed-phase HPLC trace of crude **23b** (19-mer RNA cinamoyl triazole conjugate)

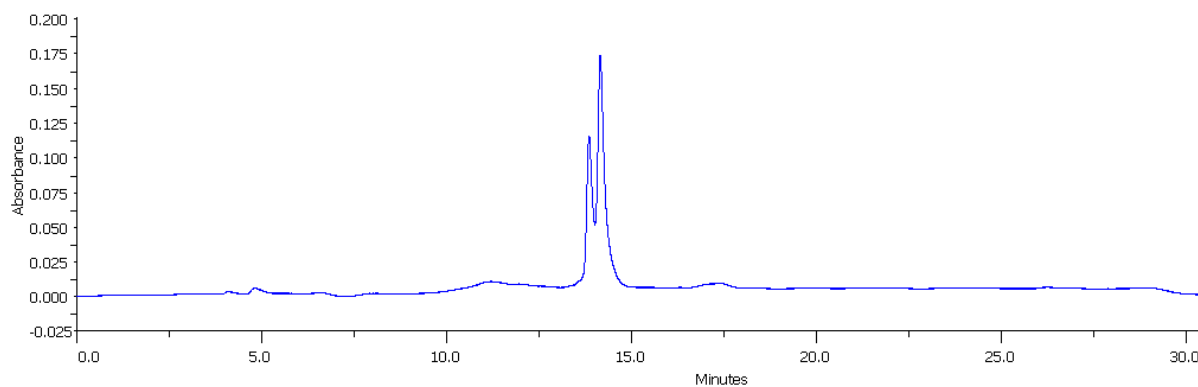

**Figure 9** Reversed-phase HPLC trace of pure **23b** (19-mer RNA cinamoyl triazole conjugate)

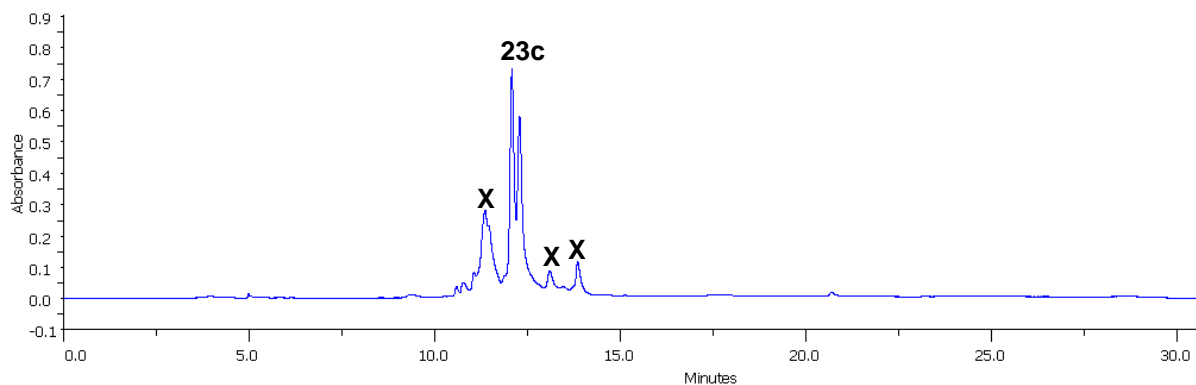

**Figure 10** Reversed-phase HPLC trace of crude **23c** (19-mer RNA biotinyl triazole conjugate)

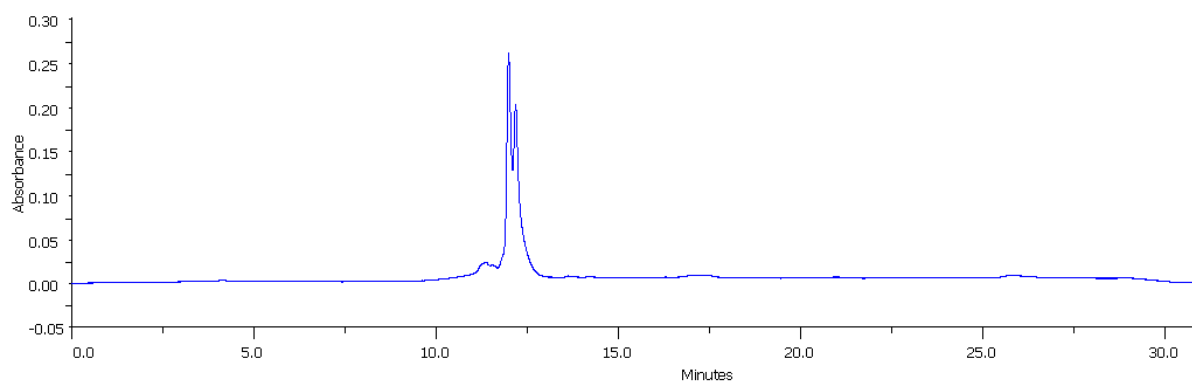

**Figure 11** Reversed-phase HPLC trace of pure **23c** (19-mer RNA biotinyl triazole conjugate)

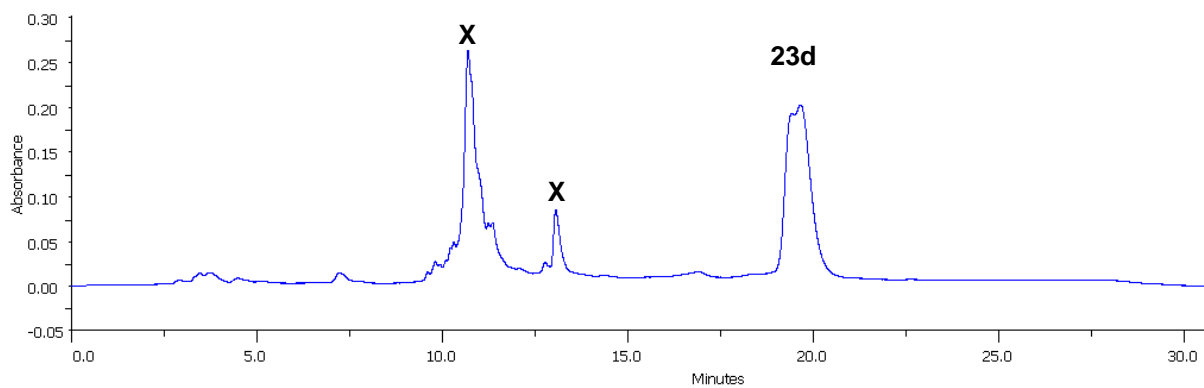

**Figure 12** Reversed-phase HPLC trace of crude **23d** (19-mer RNA cholesteryl triazole conjugate)

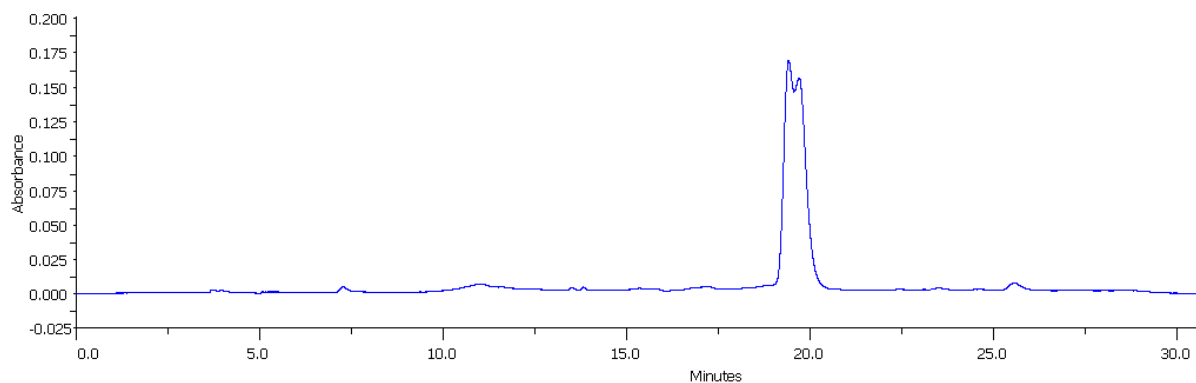

**Figure 13** Reversed-phase HPLC trace of pure **23d** (19-mer RNA cholesteryl triazole conjugate)

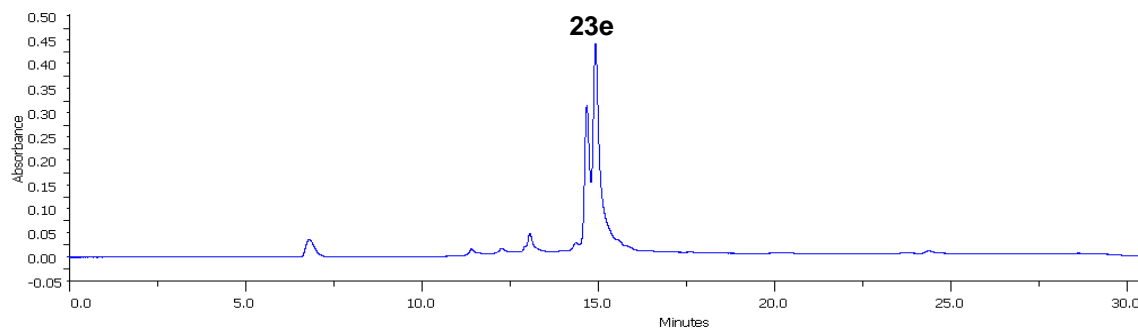

**Figure 14** Reversed-phase HPLC trace of crude **23e** (19-mer RNA fluoresceinyl triazole conjugate) (solution phase reaction)

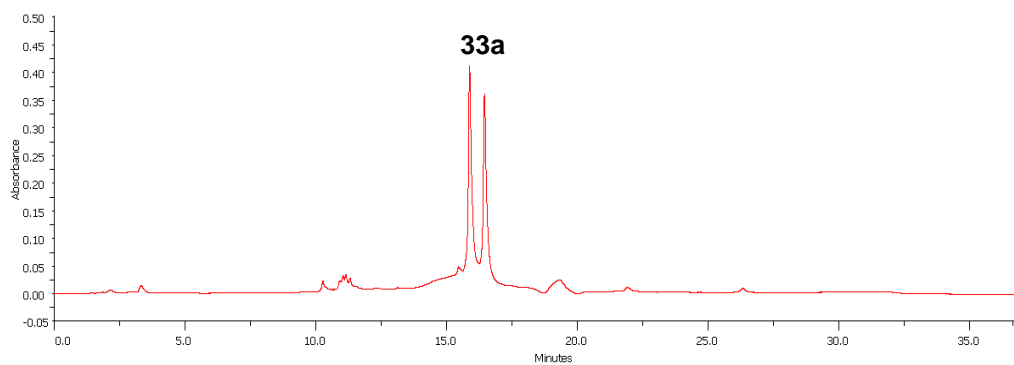

**Figure 15** Reversed-phase HPLC trace of crude **33a** (U<sub>4</sub>-phenyl isoxazole conjugate)

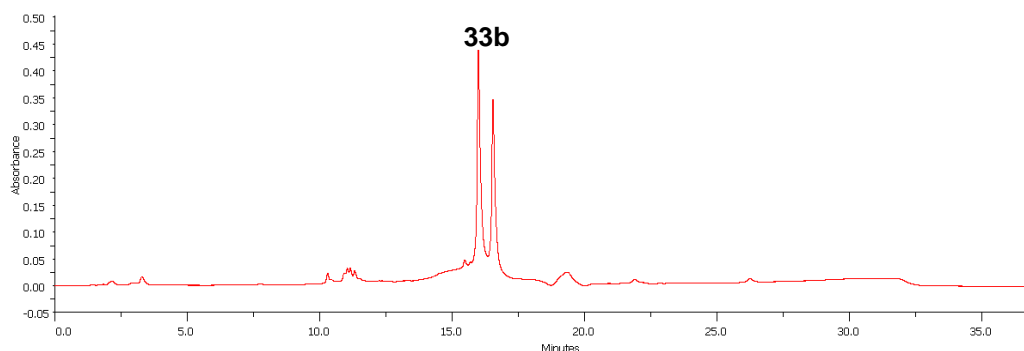

**Figure 16** Reversed-phase HPLC trace of crude **33b** (U<sub>4</sub>-2-fluorophenyl isoxazole conjugate)

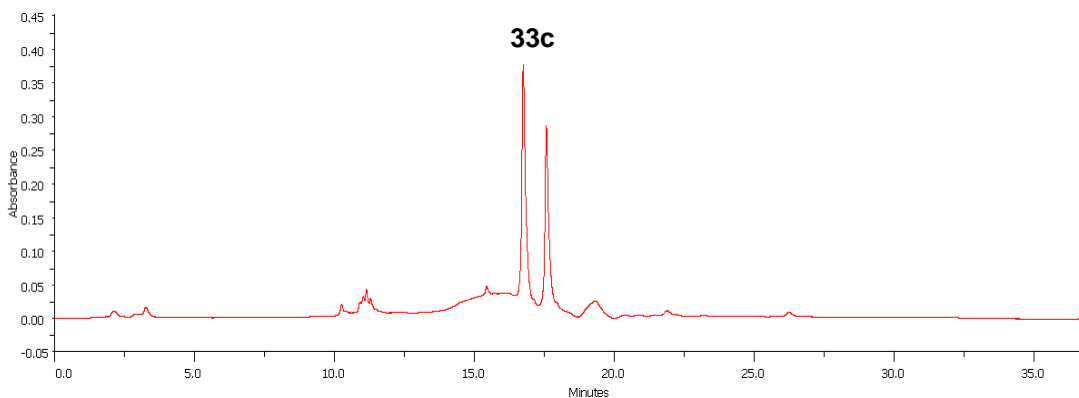

**Figure 17** Reversed-phase HPLC trace of crude **33c** (U<sub>4</sub>-naphthyl isoxazole conjugate)

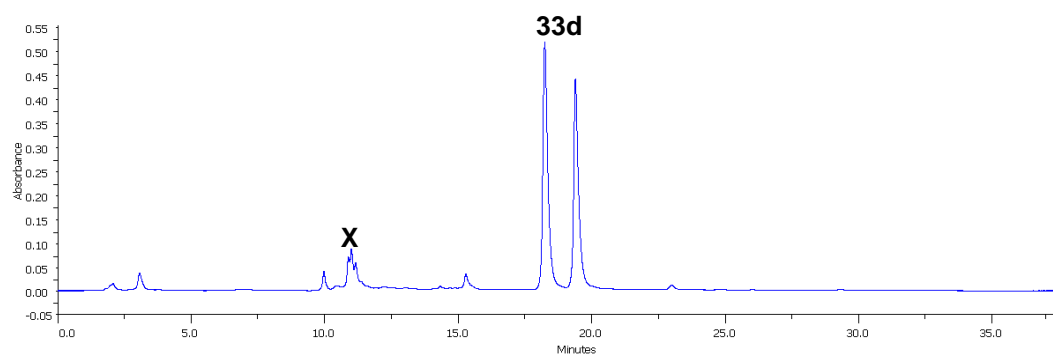

**Figure 18** Reversed-phase HPLC trace of crude **33d** (U<sub>4</sub>-pyrenyl isoxazole conjugate)

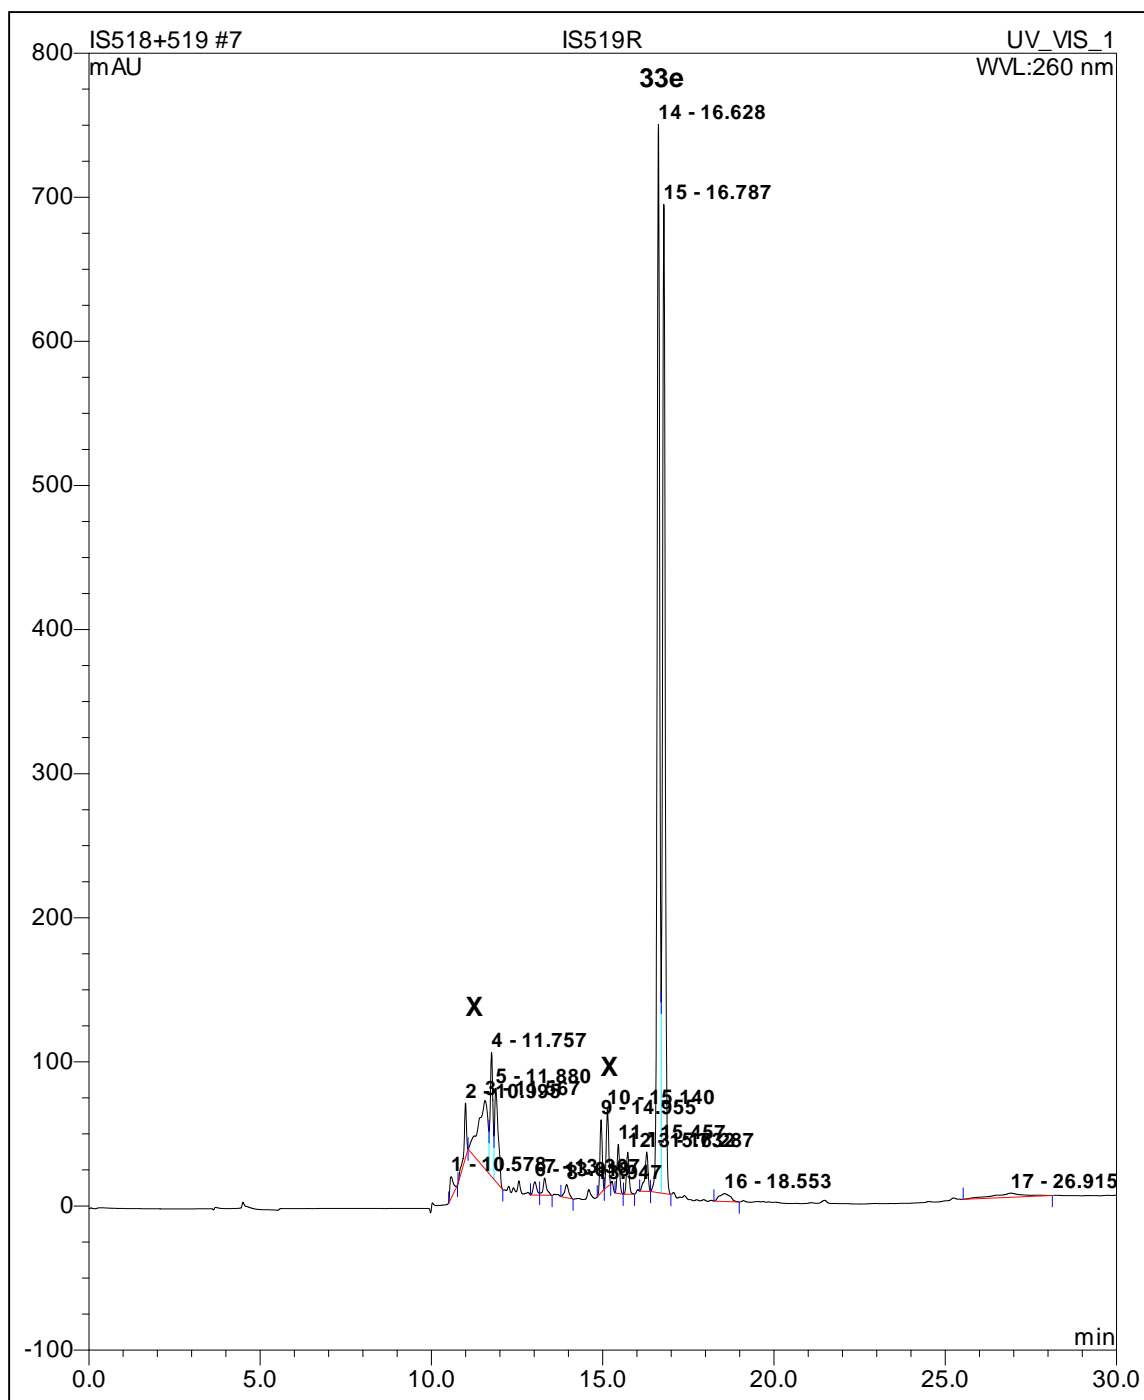

**Figure 19** Reversed-phase HPLC trace of crude **33e** ( $U_4$ -coumarinyl isoxazole conjugate)



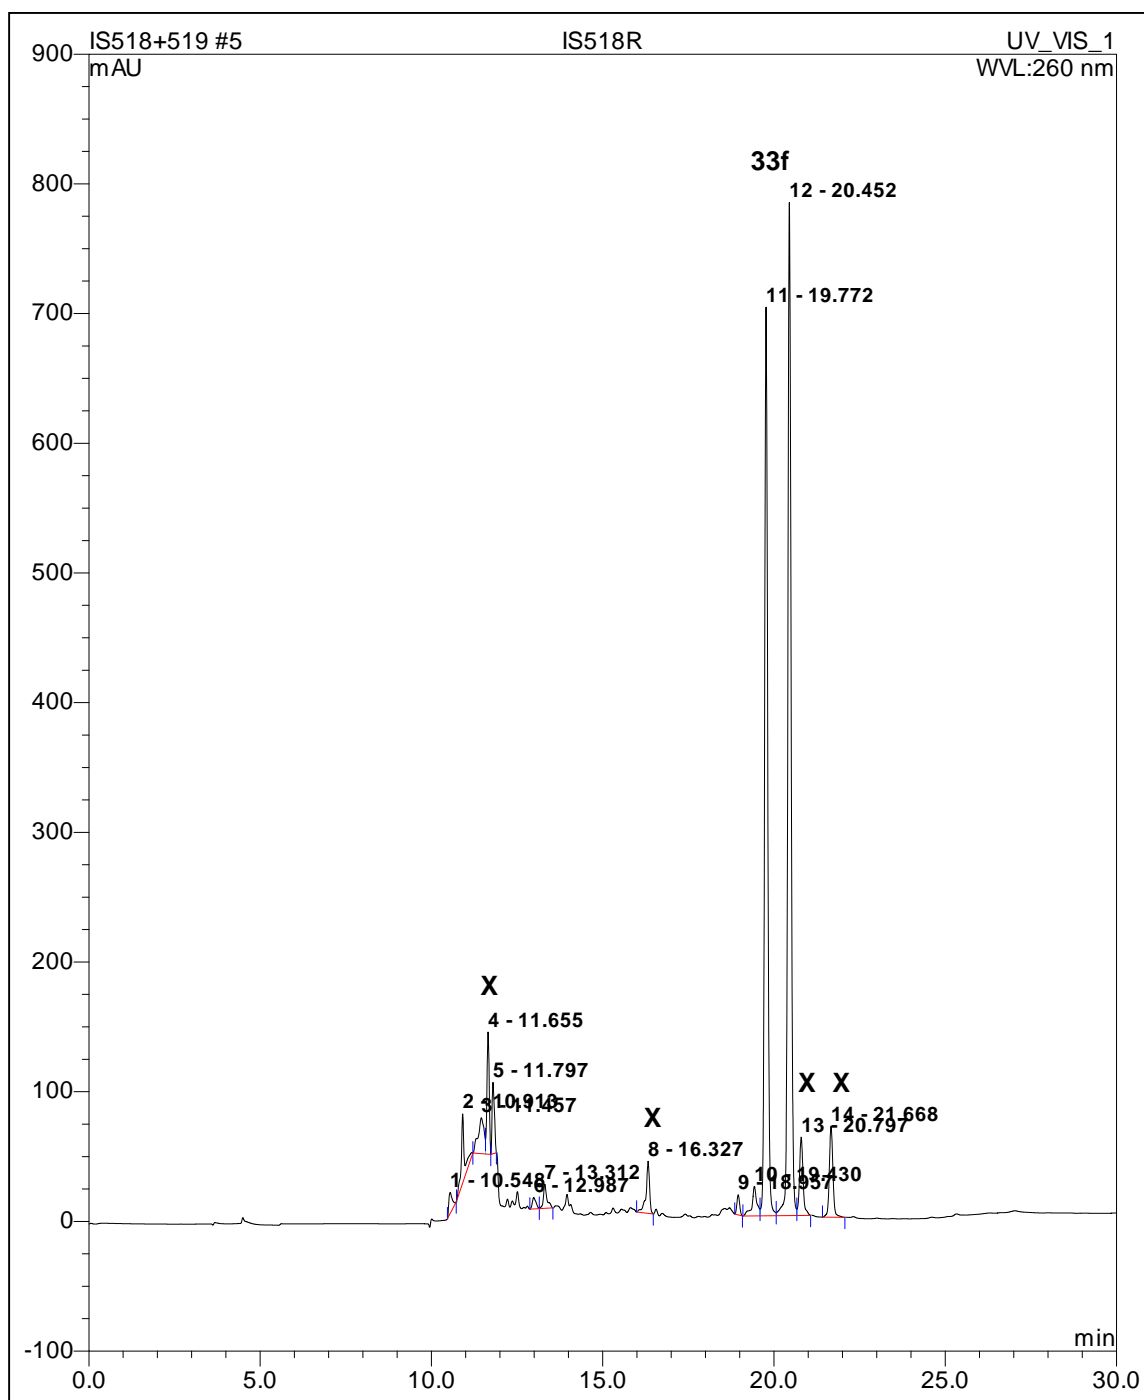

**Figure 20** Reversed-phase HPLC trace of crude **33f** (U<sub>4</sub>-dabcyl isoxazole conjugate)

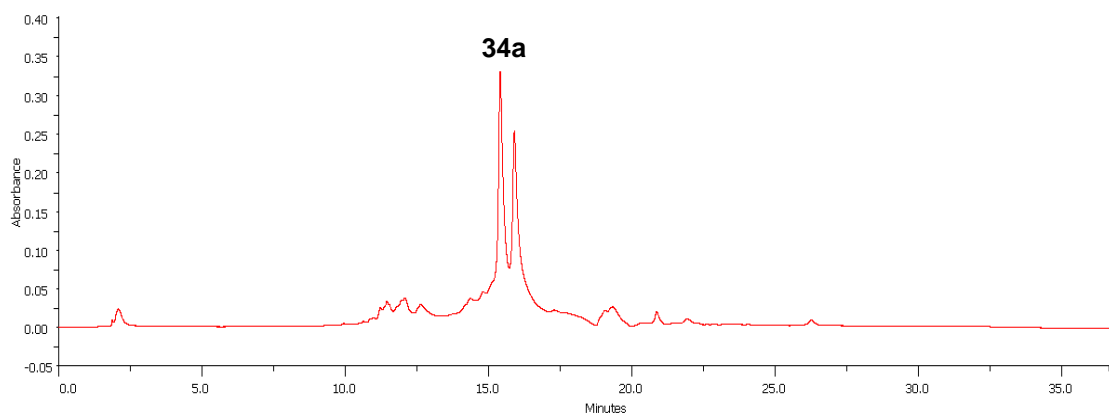

**Figure 21** Reversed-phase HPLC trace of crude **34a** (9-mer RNA phenyl isoxazole conjugate)

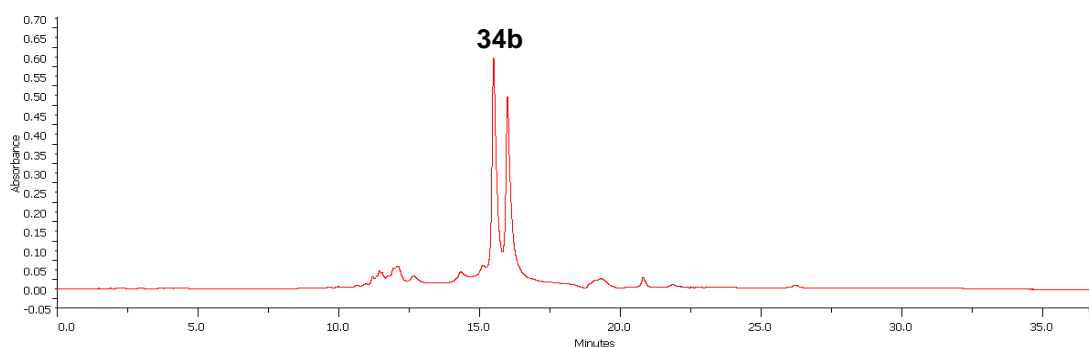

**Figure 22** Reversed-phase HPLC trace of crude **34b** (9-mer RNA 2-fluorophenyl isoxazole conjugate)

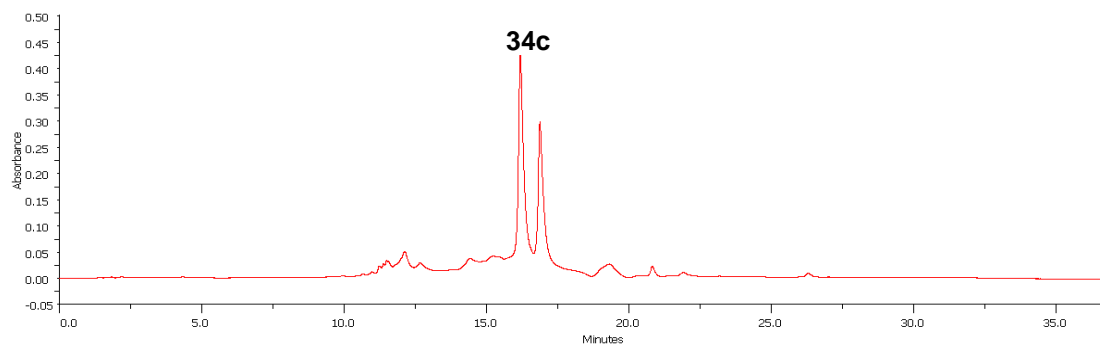

**Figure 23** Reversed-phase HPLC trace of crude **34c** (9-mer RNA naphthyl isoxazole conjugate)

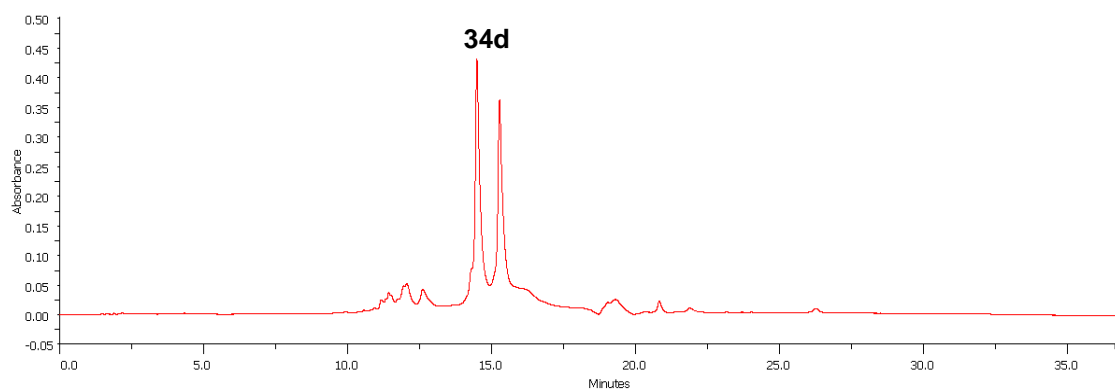

**Figure 24** Reversed-phase HPLC trace of crude **34d** (9-mer RNA 2-(2-hydroxyethoxy)phenyl isoxazole conjugate)

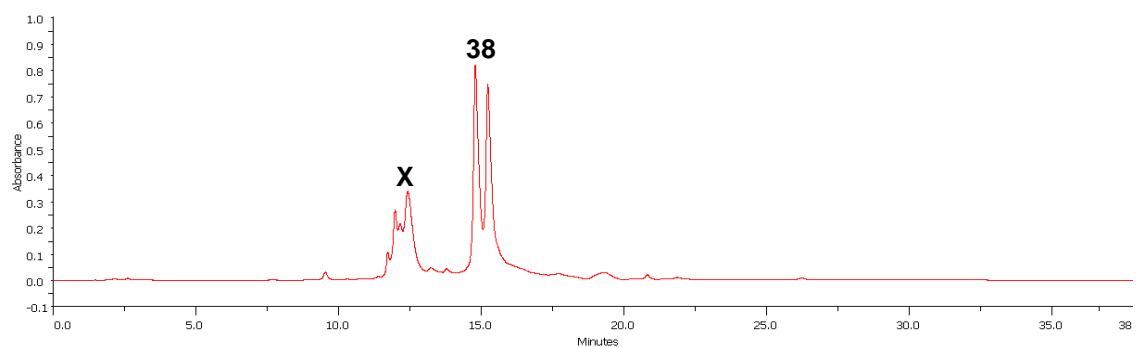

**Figure 25** Reversed-phase HPLC trace of crude **38** (19-mer RNA phenyl isoxazole conjugate)

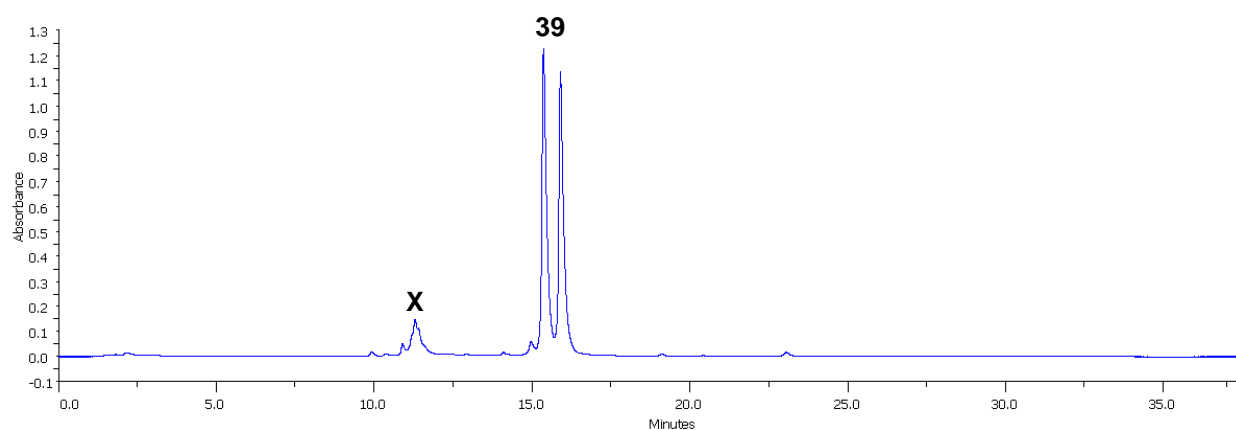

**Figure 26** Reversed-phase HPLC trace of crude **39** (U<sub>4</sub>-alternate phenyl isoxazole RNA-conjugate)

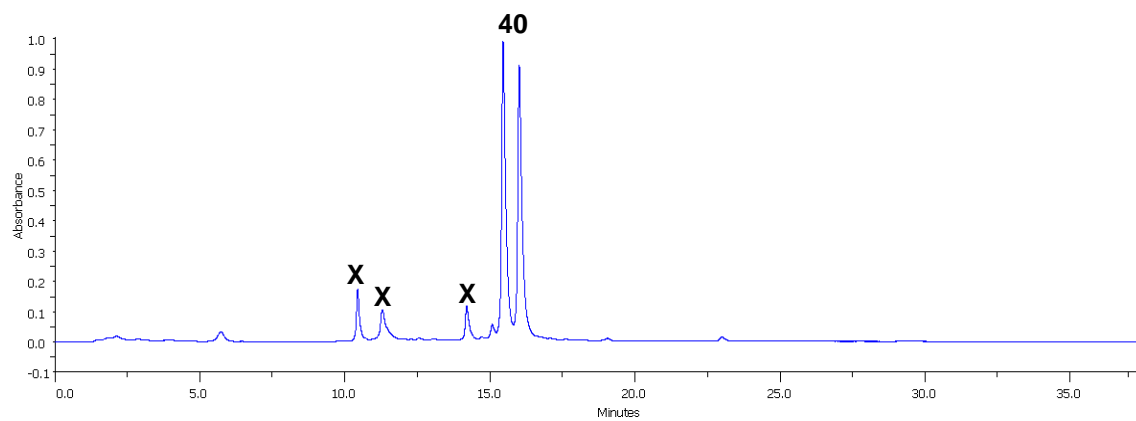

**Figure 27** Reversed-phase HPLC trace of crude **40** (gapmer phenyl isoxazole RNA-conjugate)

**Table 1: MALDI-TOF MS data**

| <b>Compound no</b> | <b>RNA Mass calcd., found</b> | <b>Compound no</b> | <b>RNA Mass calcd., found</b> |
|--------------------|-------------------------------|--------------------|-------------------------------|
| <b>7</b>           | 6488, 6493                    | <b>33e</b>         | 1688, 1684                    |
| <b>8</b>           | 1476, 1477                    | <b>33f</b>         | 1744, 1746                    |
| <b>9</b>           | 3255, 3254                    | <b>34a</b>         | 3374, 3379                    |
| <b>10</b>          | 2115, 2118                    | <b>34b</b>         | 3392, 3393                    |
| <b>11</b>          | 1839, 1840                    | <b>34c</b>         | 3424, 3428                    |
| <b>23a</b>         | 6624, 6623                    | <b>34d</b>         | 3434, 3436                    |
| <b>23b</b>         | 6650, 6650                    | <b>38</b>          | 6607, 6611                    |
| <b>23c</b>         | 6831, 6833                    | <b>39</b>          | 2234, 2238                    |
| <b>23d</b>         | 7018, 7020                    | <b>40</b>          | 1958, 1960                    |
| <b>23e</b>         | 6931, 6934                    |                    |                               |
| <b>33a</b>         | 1595, 1596                    |                    |                               |
| <b>33b</b>         | 1613, 1614                    |                    |                               |
| <b>33c</b>         | 1645, 1647                    |                    |                               |
| <b>33d</b>         | 1719, 1721                    |                    |                               |

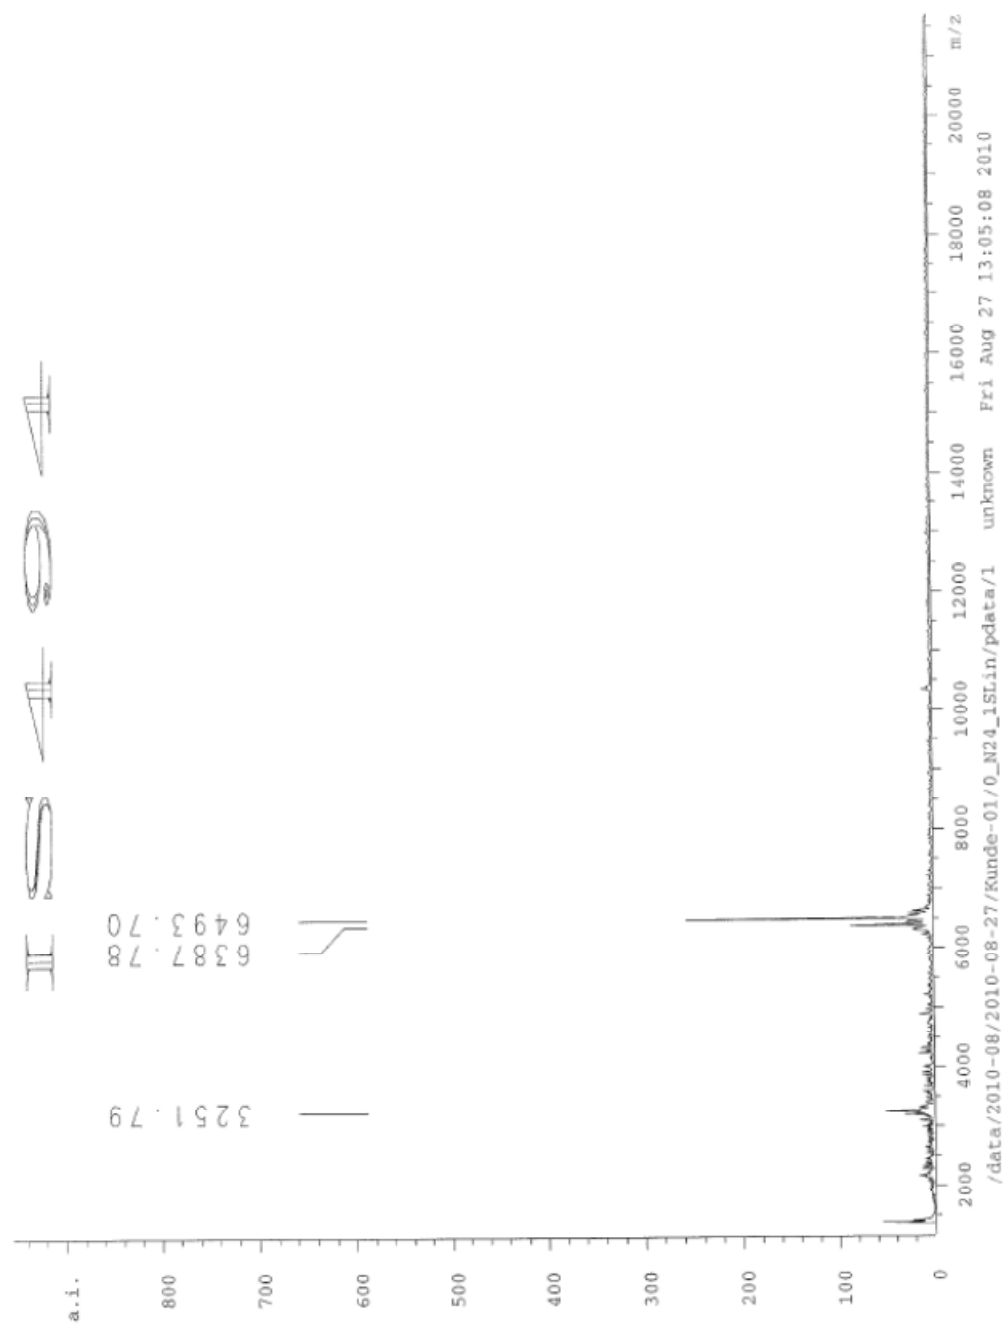

MALDI TOF MS of crude **12** (19-mer RNA-cyclooctyne)

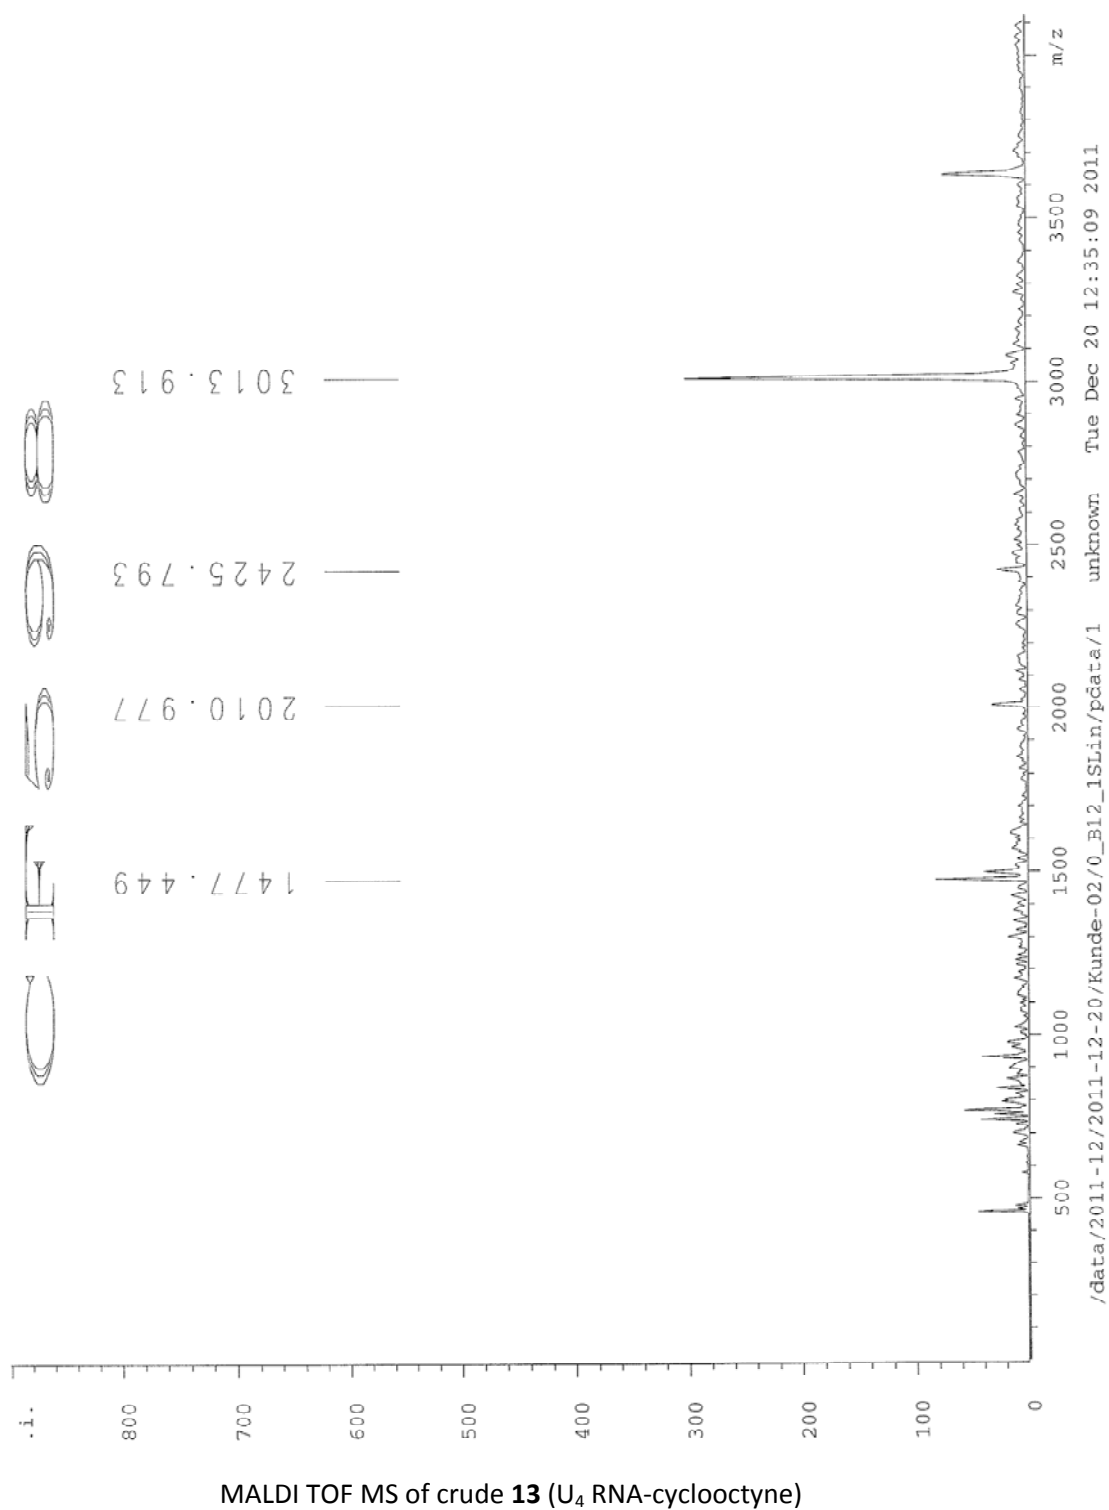

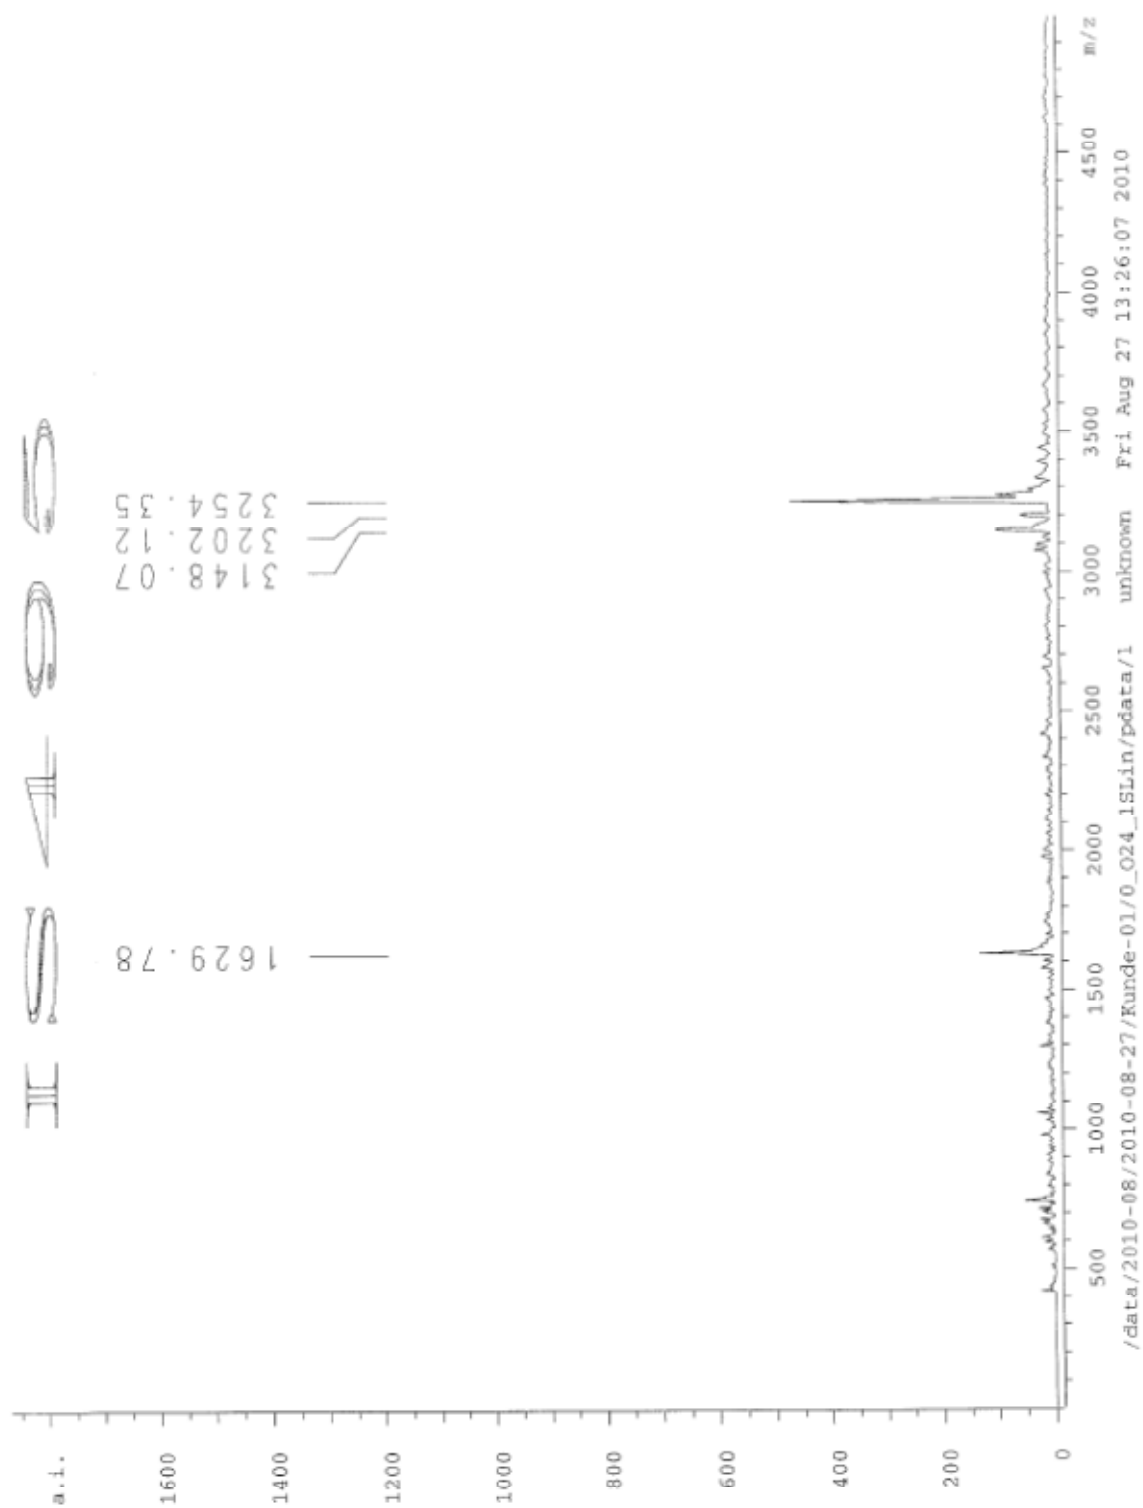

MALDI TOF MS of crude **14** (9-mer RNA-cyclooctyne)

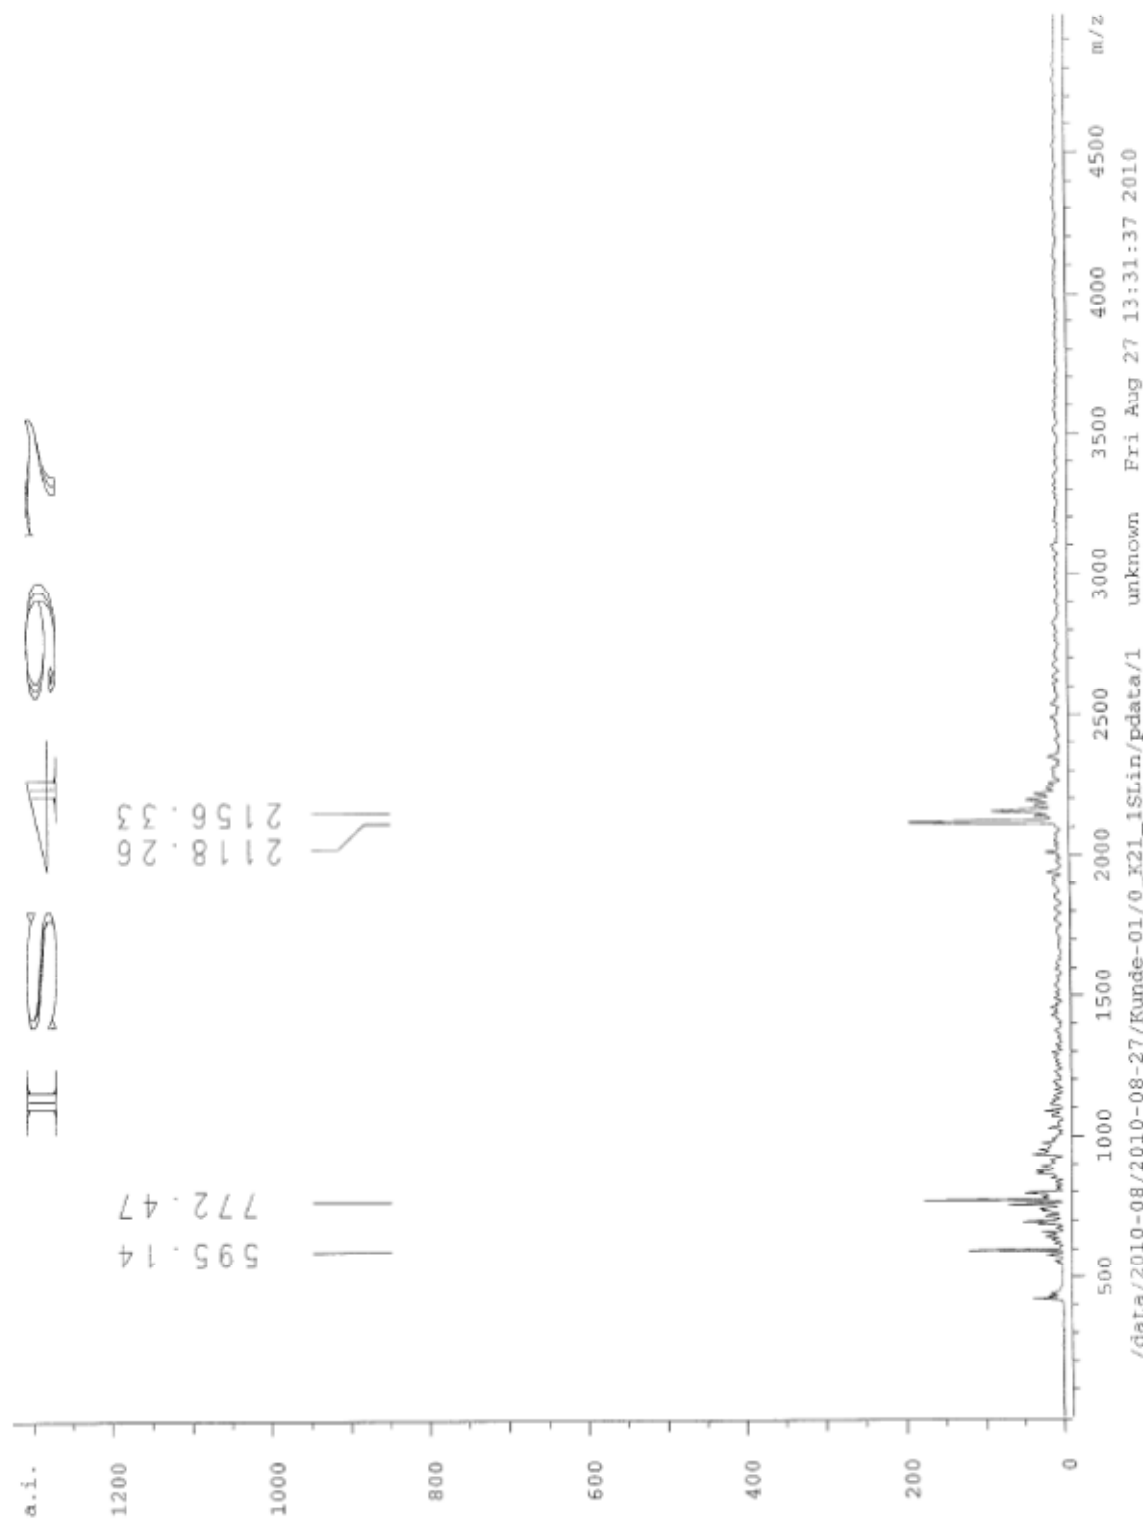

MALDI TOF MS of crude **15** (U<sub>6</sub>-alternate RNA-cyclooctyne)



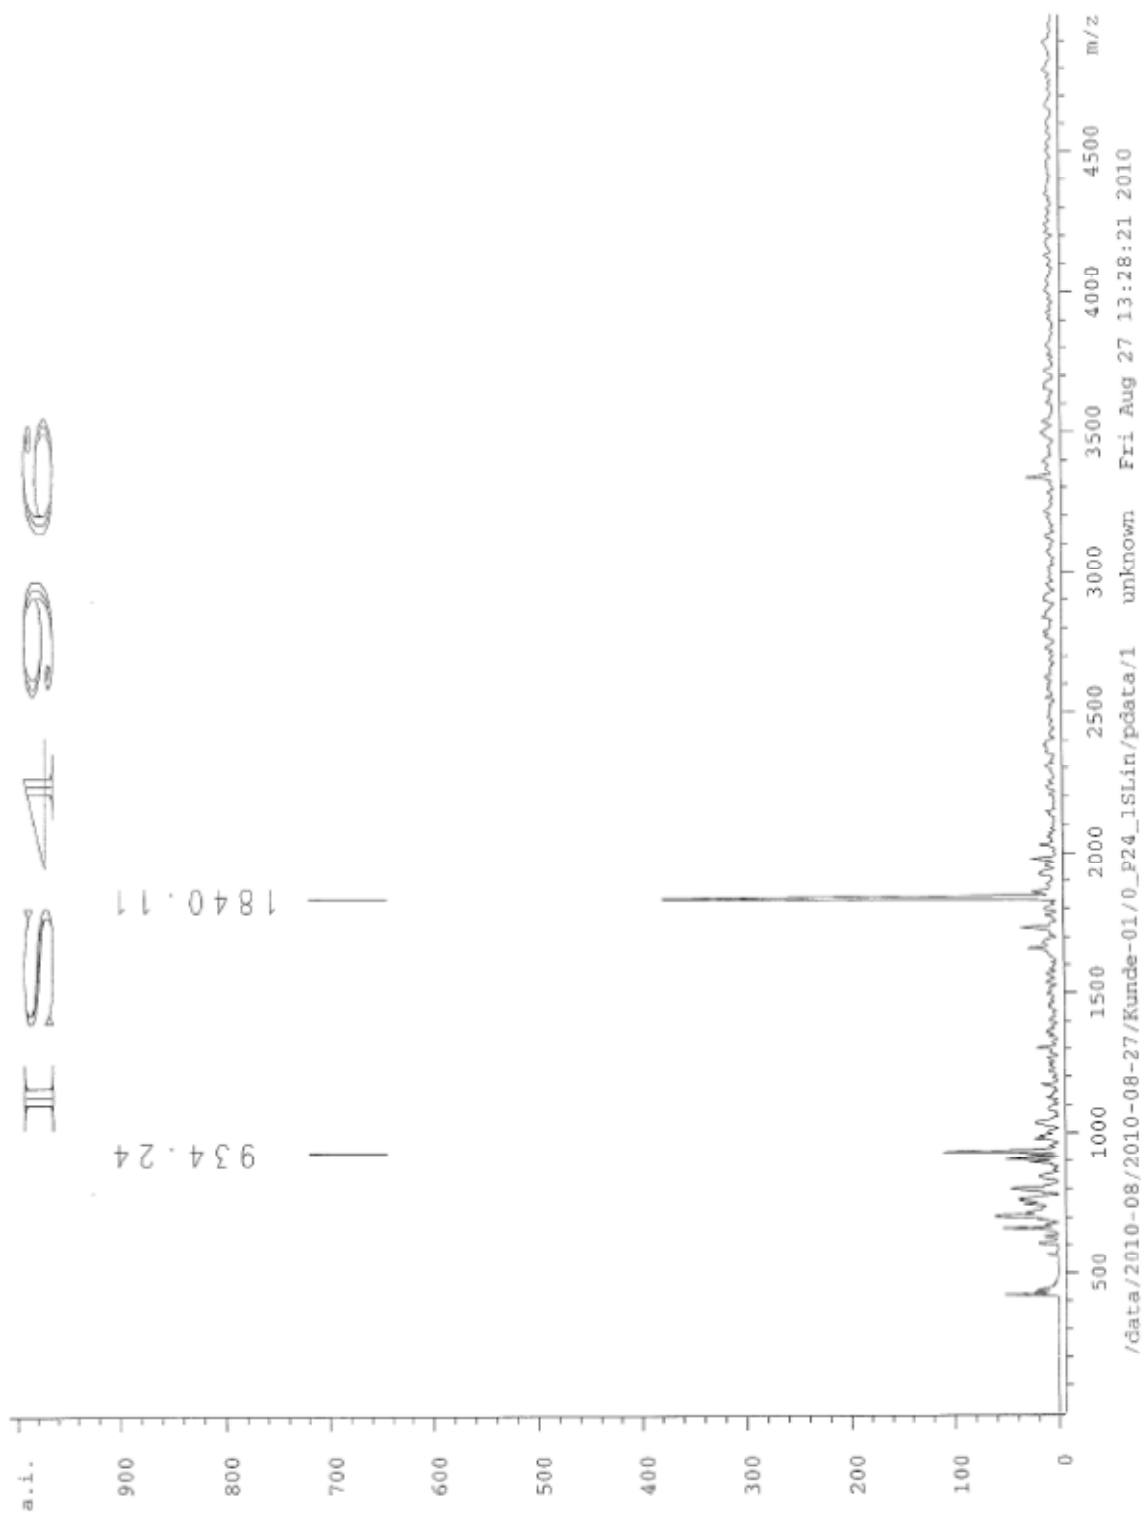

MALDI TOF MS of crude **16** (gapmer RNA-cyclooctyne)

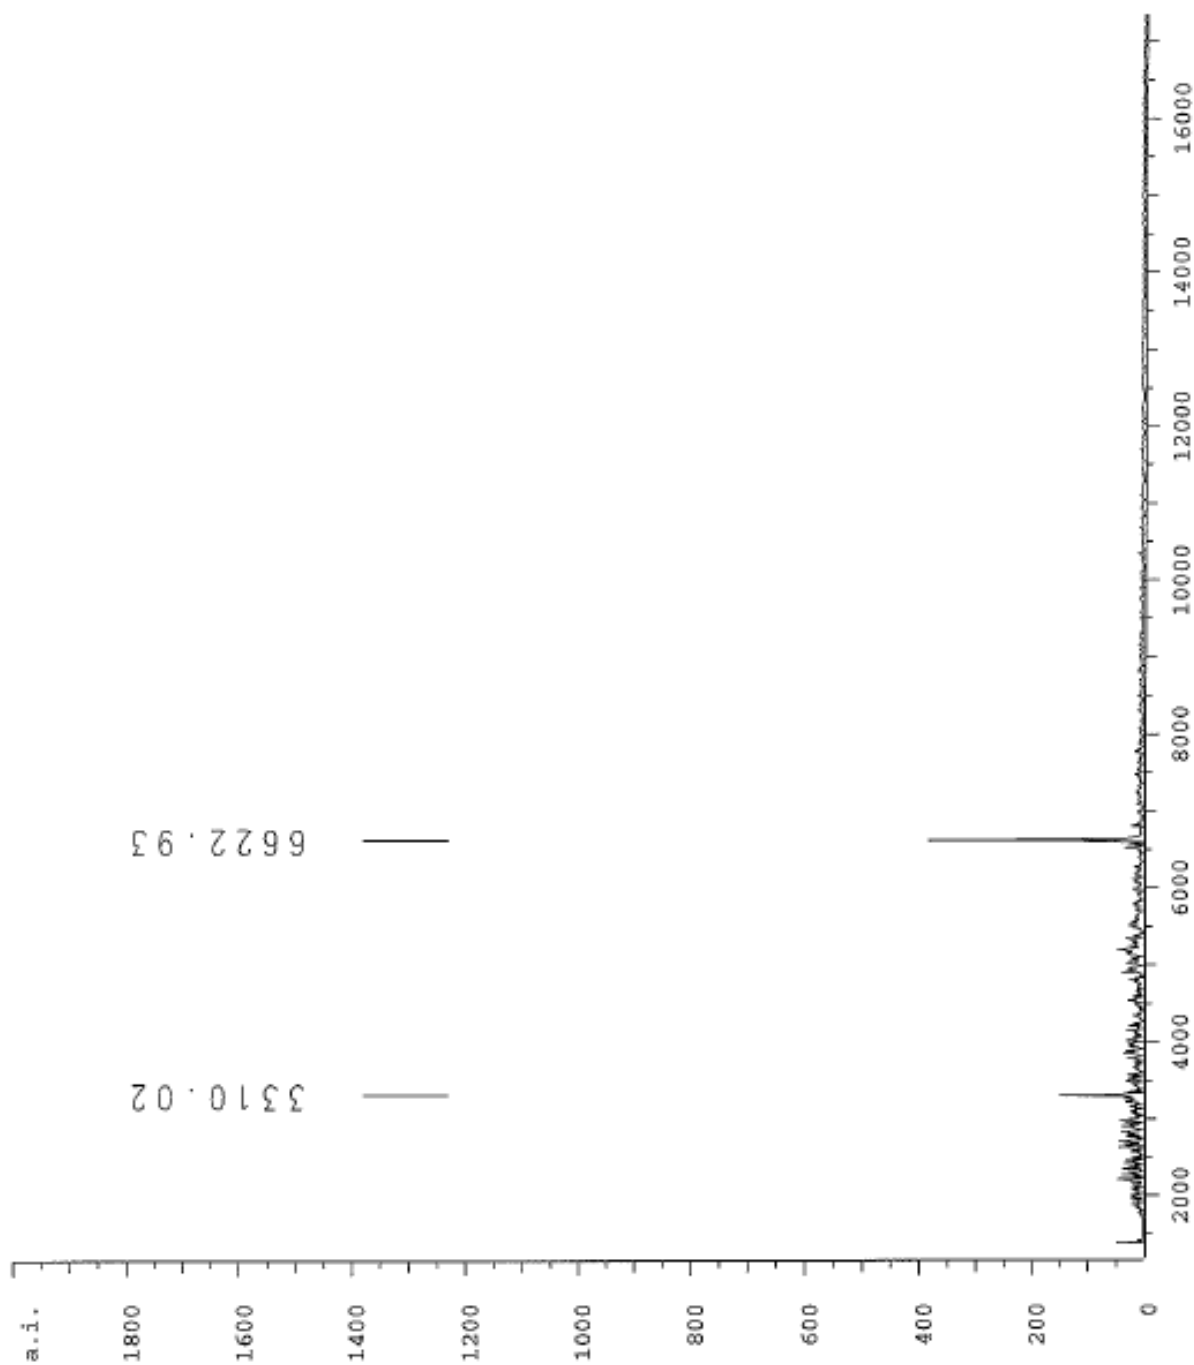

MALDI TOF MS of pure **23a** (19-mer RNA benzyl triazole conjugate)

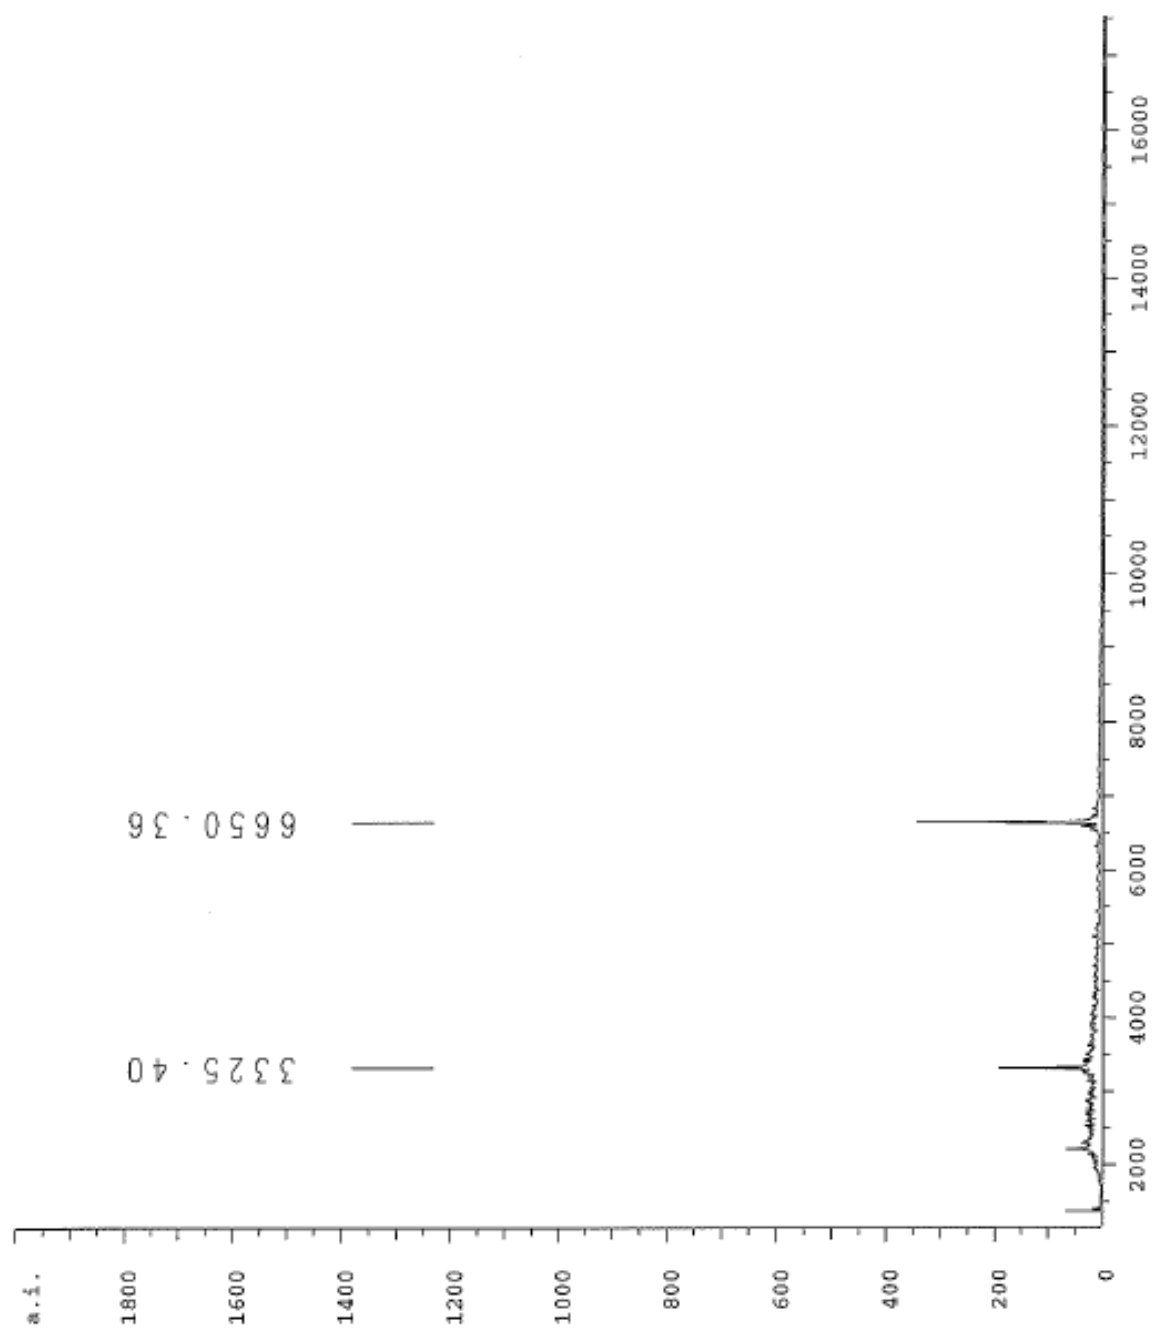

MALDI TOF MS of pure **23b** (19-mer RNA cinamoyl triazole conjugate)

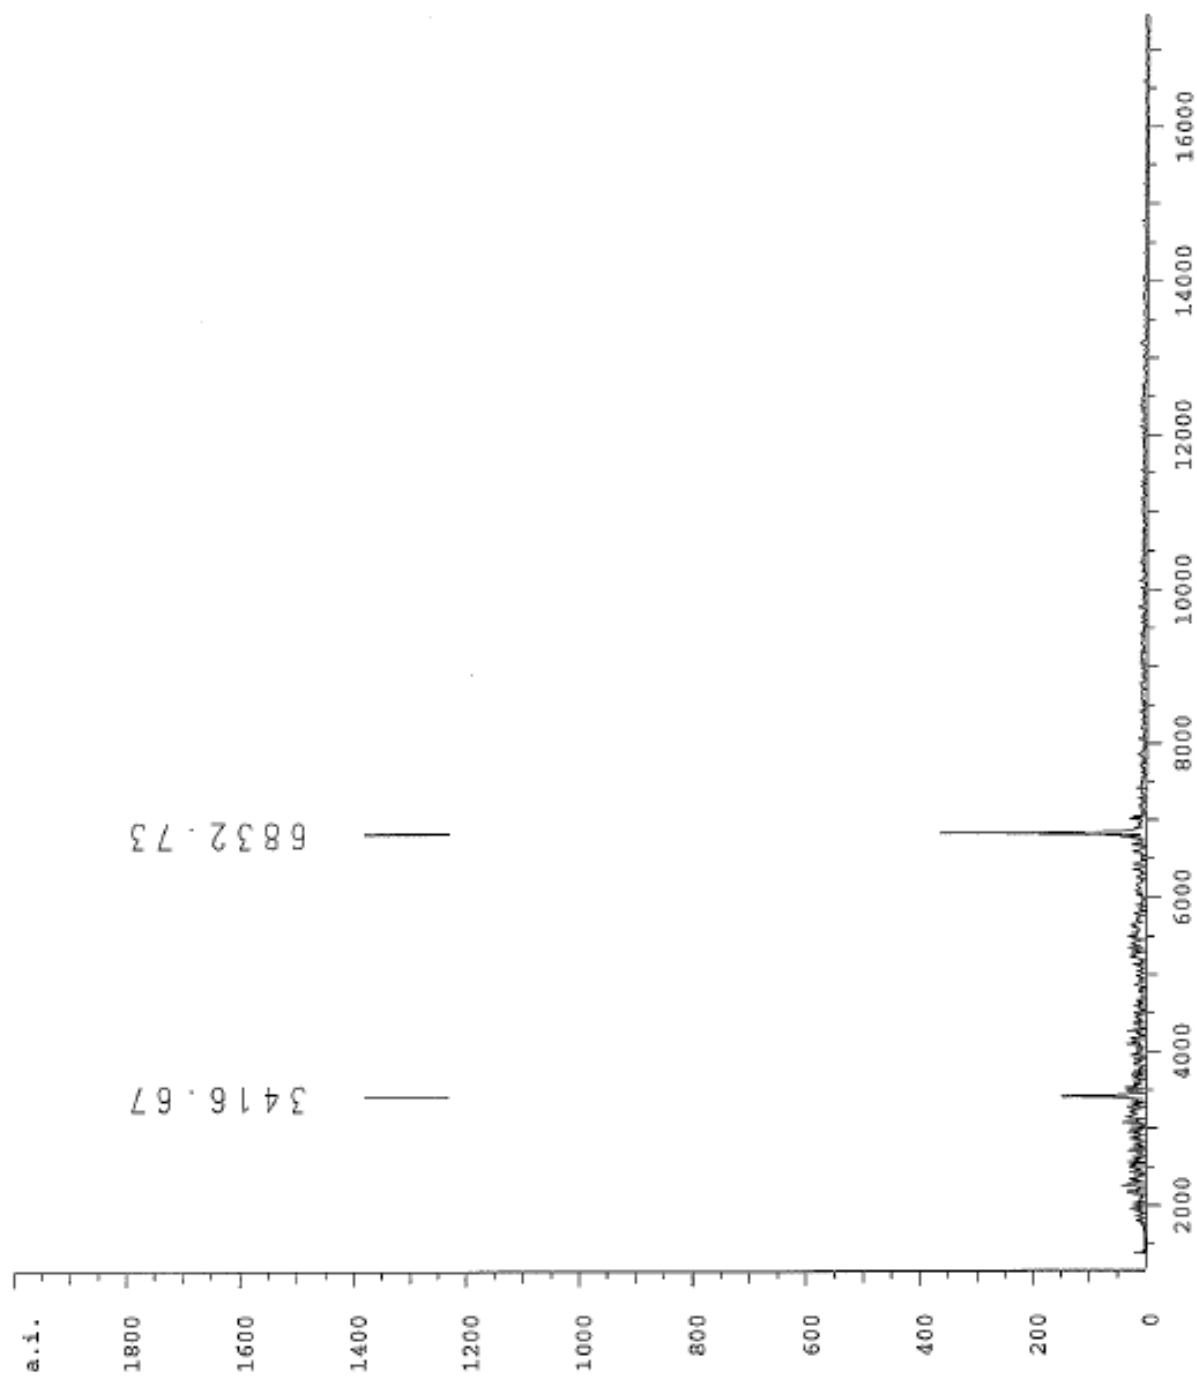

MALDI TOF MS of pure **23c** (19-mer RNA biotinyl triazole conjugate)

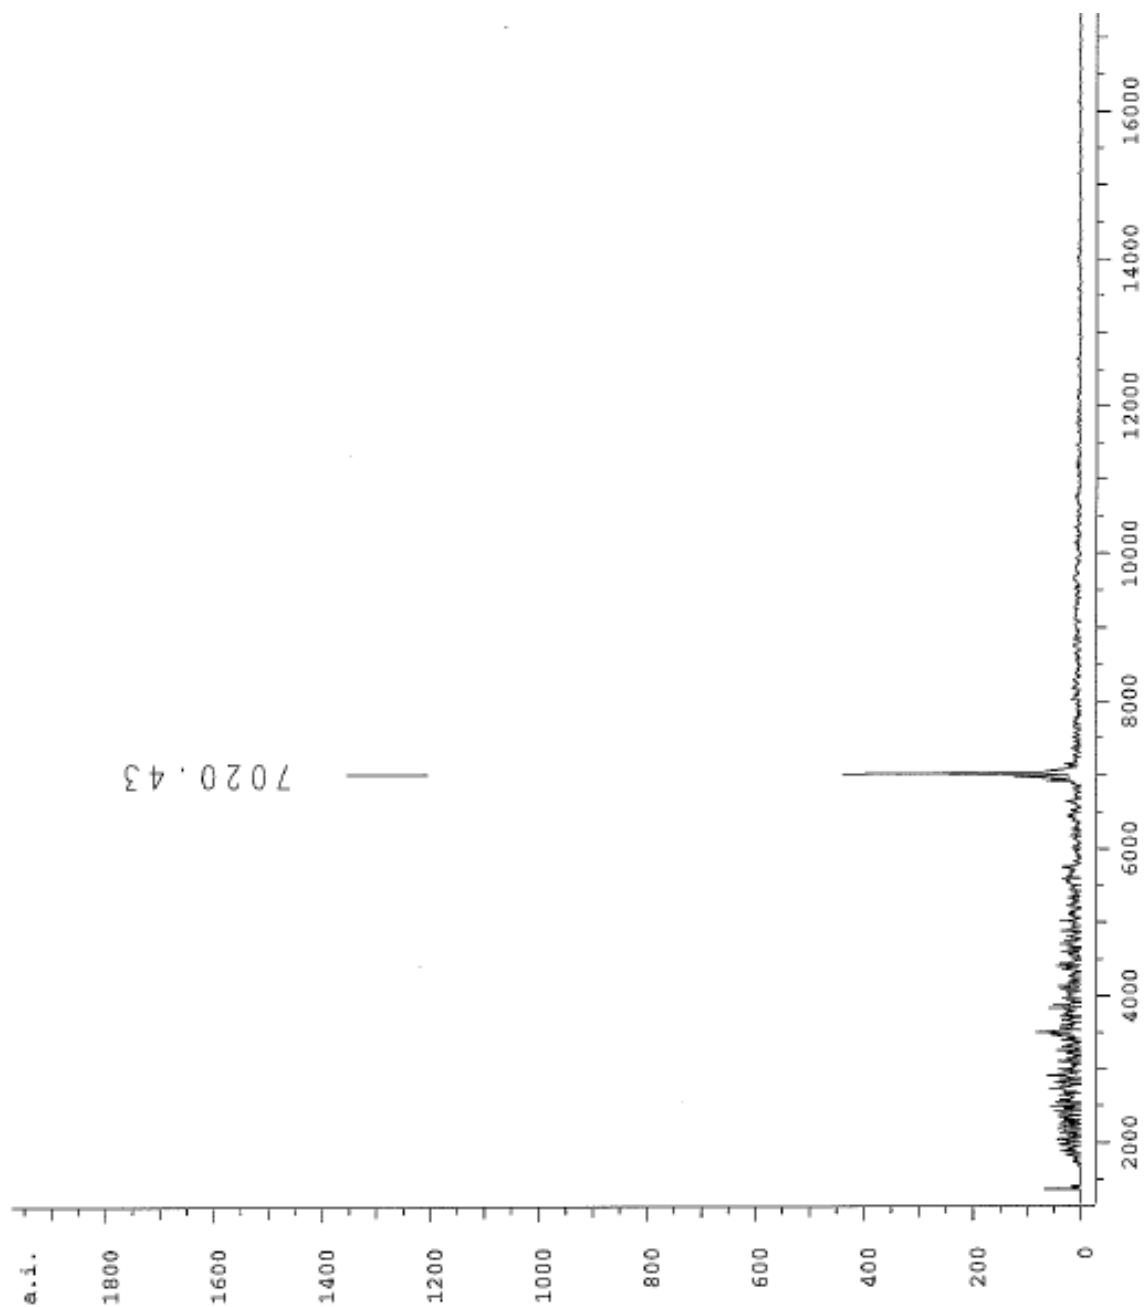

MALDI TOF MS of **23d** (19-mer RNA cholesteryl triazole conjugate)

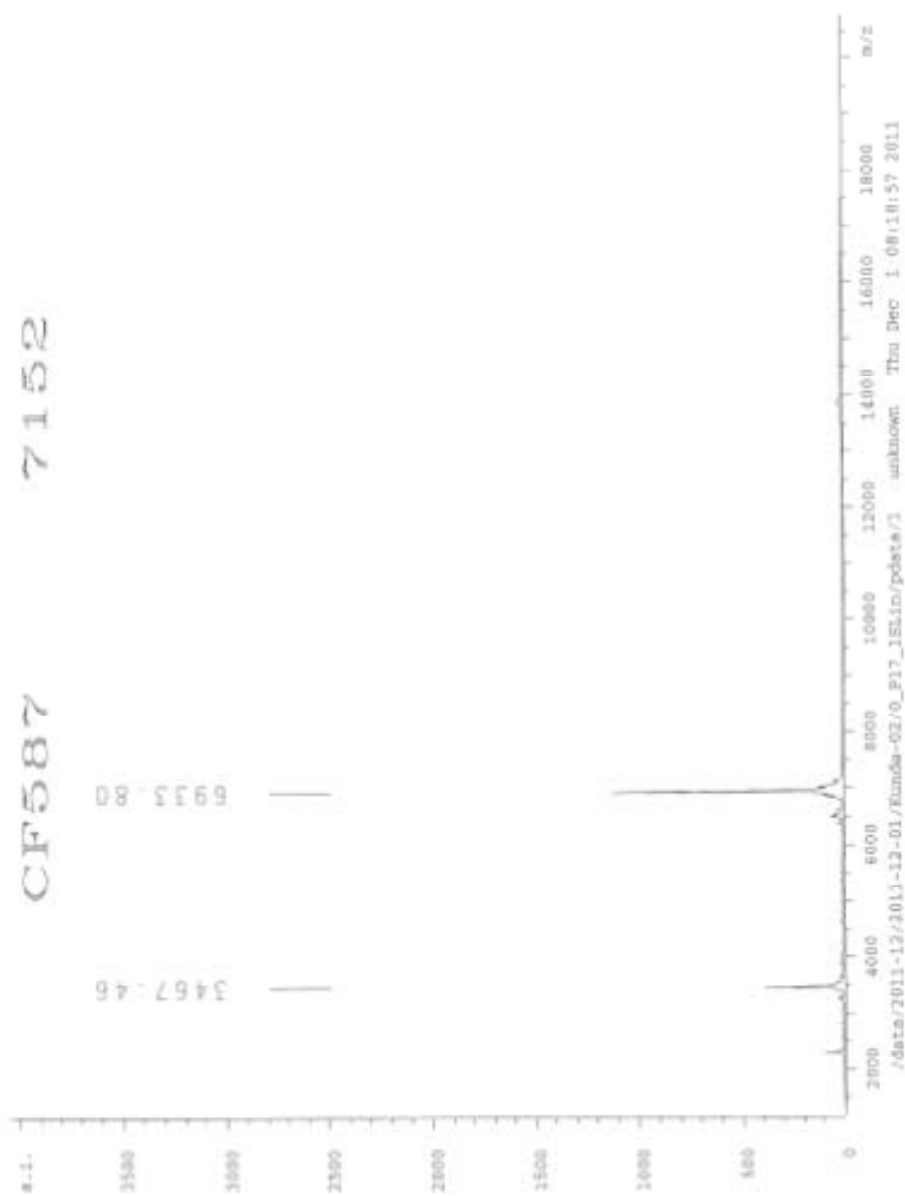

MALDI TOF MS of pure **23e** (19-mer RNA fluoresceinyl triazole conjugate)

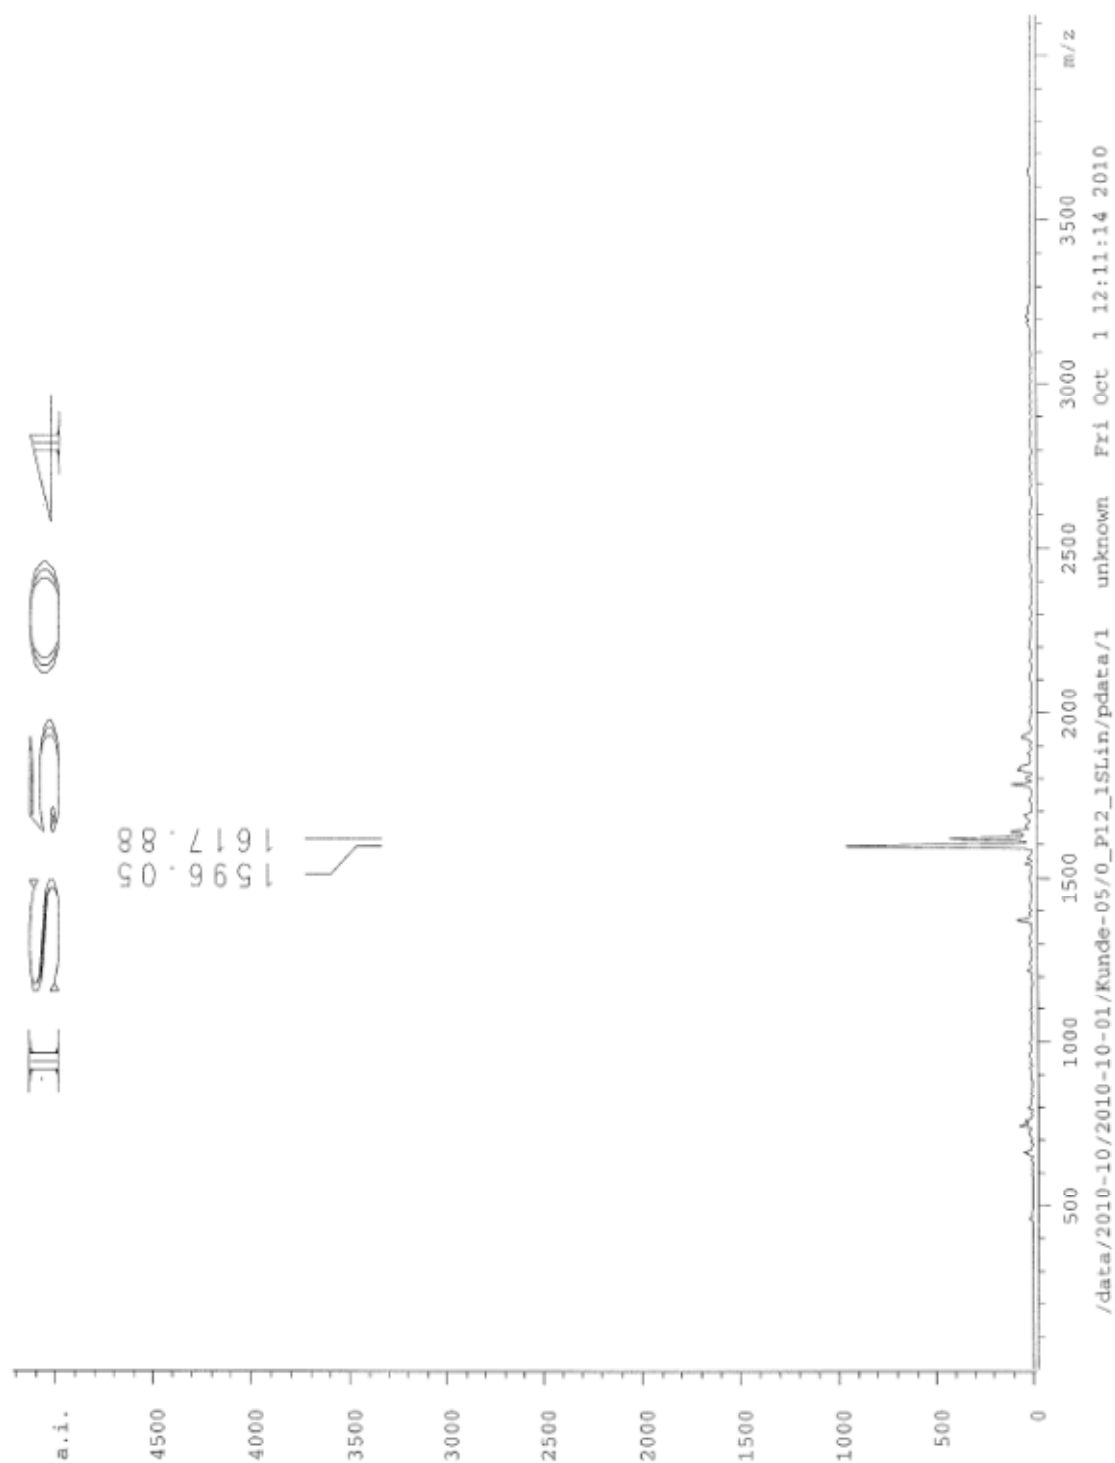

MALDI TOF MS of crude **33a** (U<sub>4</sub>-phenyl isoxazole RNA-conjugate)

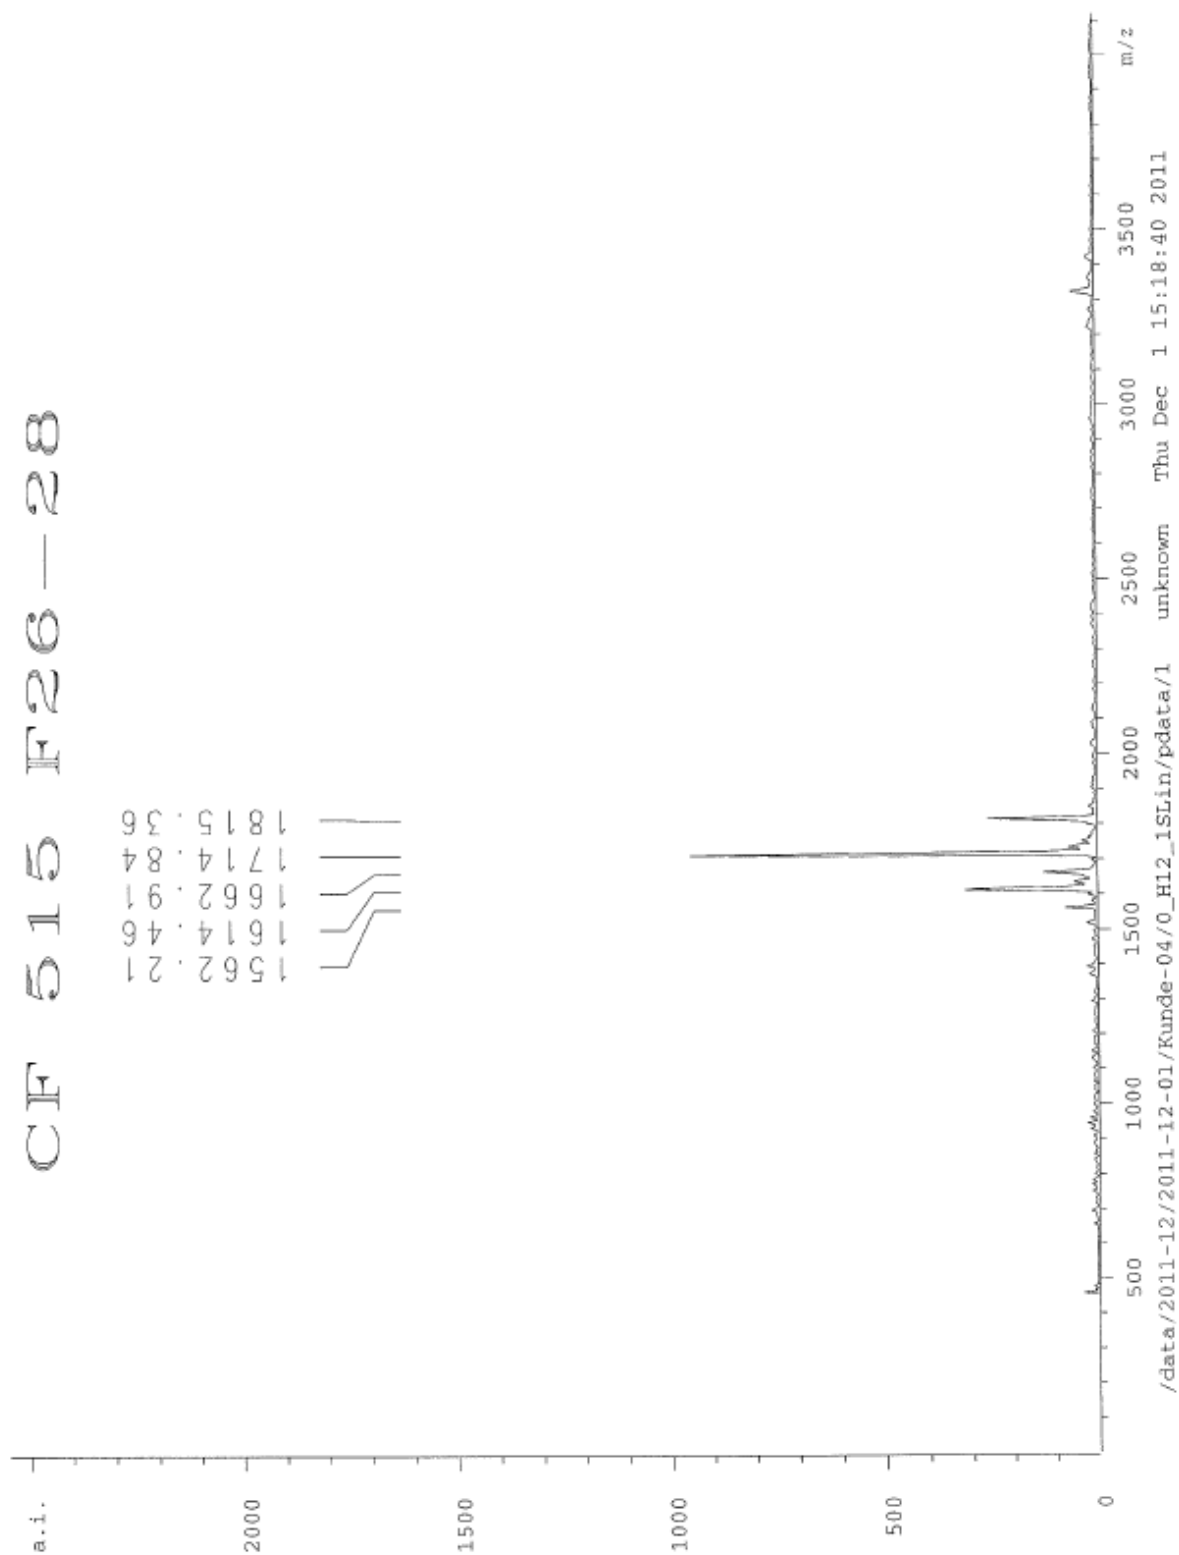

MALDI TOF MS of crude **33b** (U<sub>4</sub>-2-fluorophenyl isoxazole RNA-conjugate)



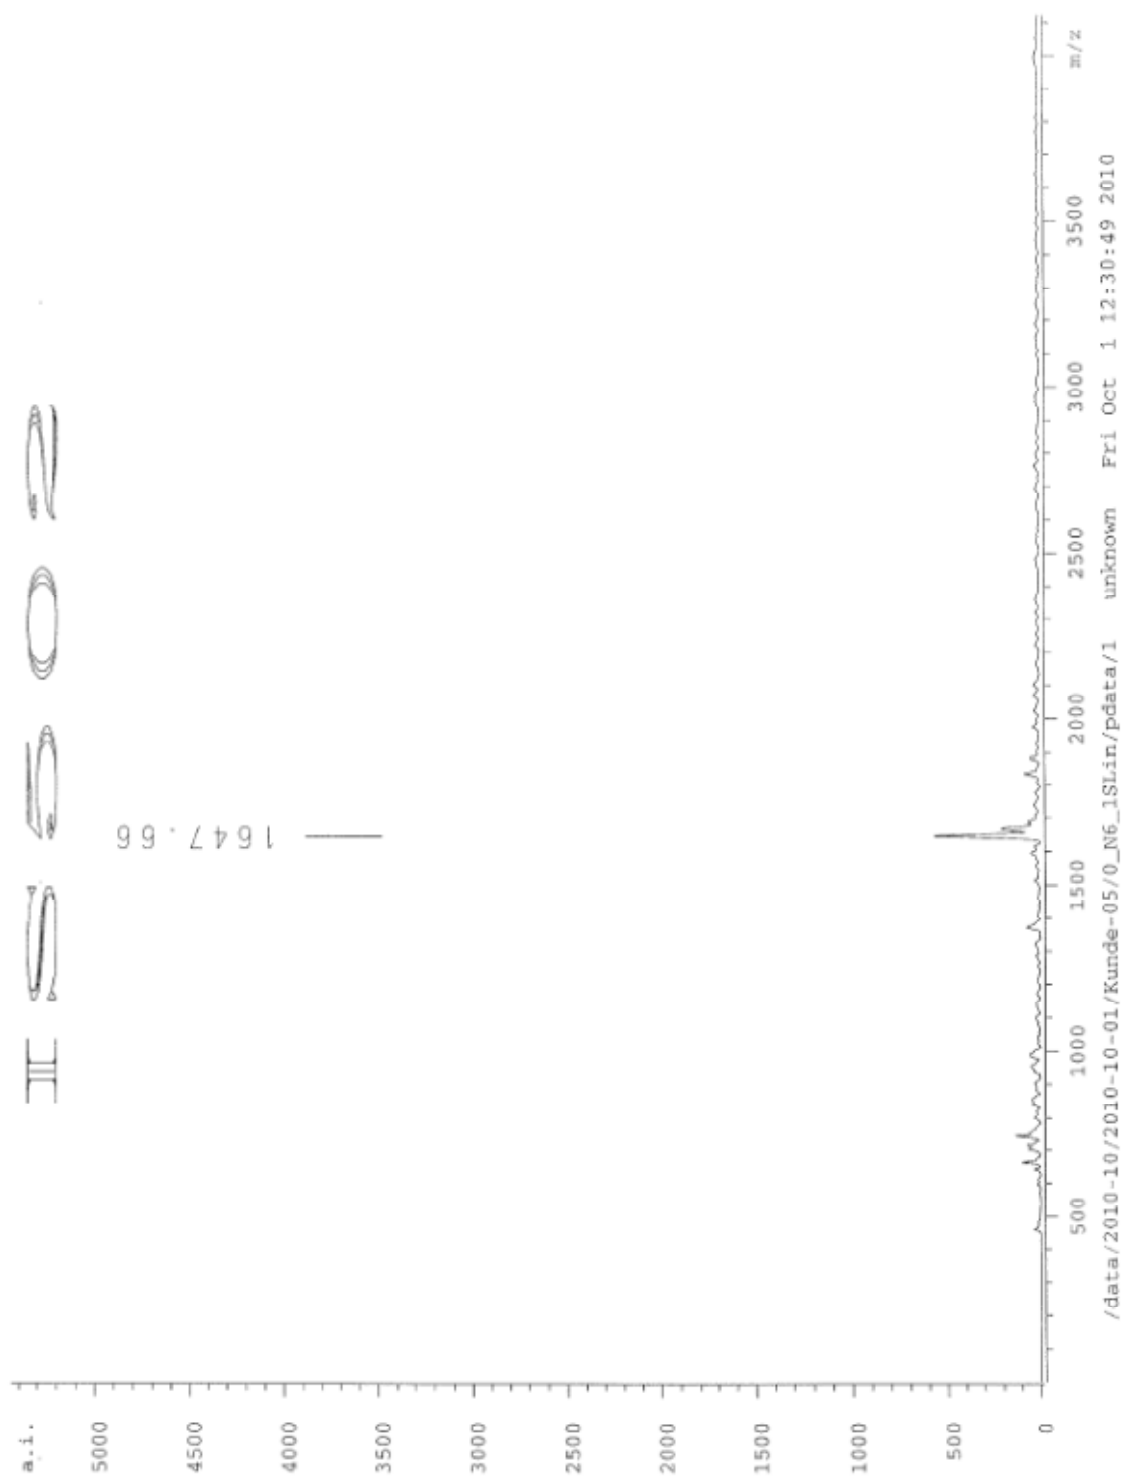

MALDI TOF MS of crude **33c** ( $U_4$ -naphthyl isoxazole RNA-conjugate)

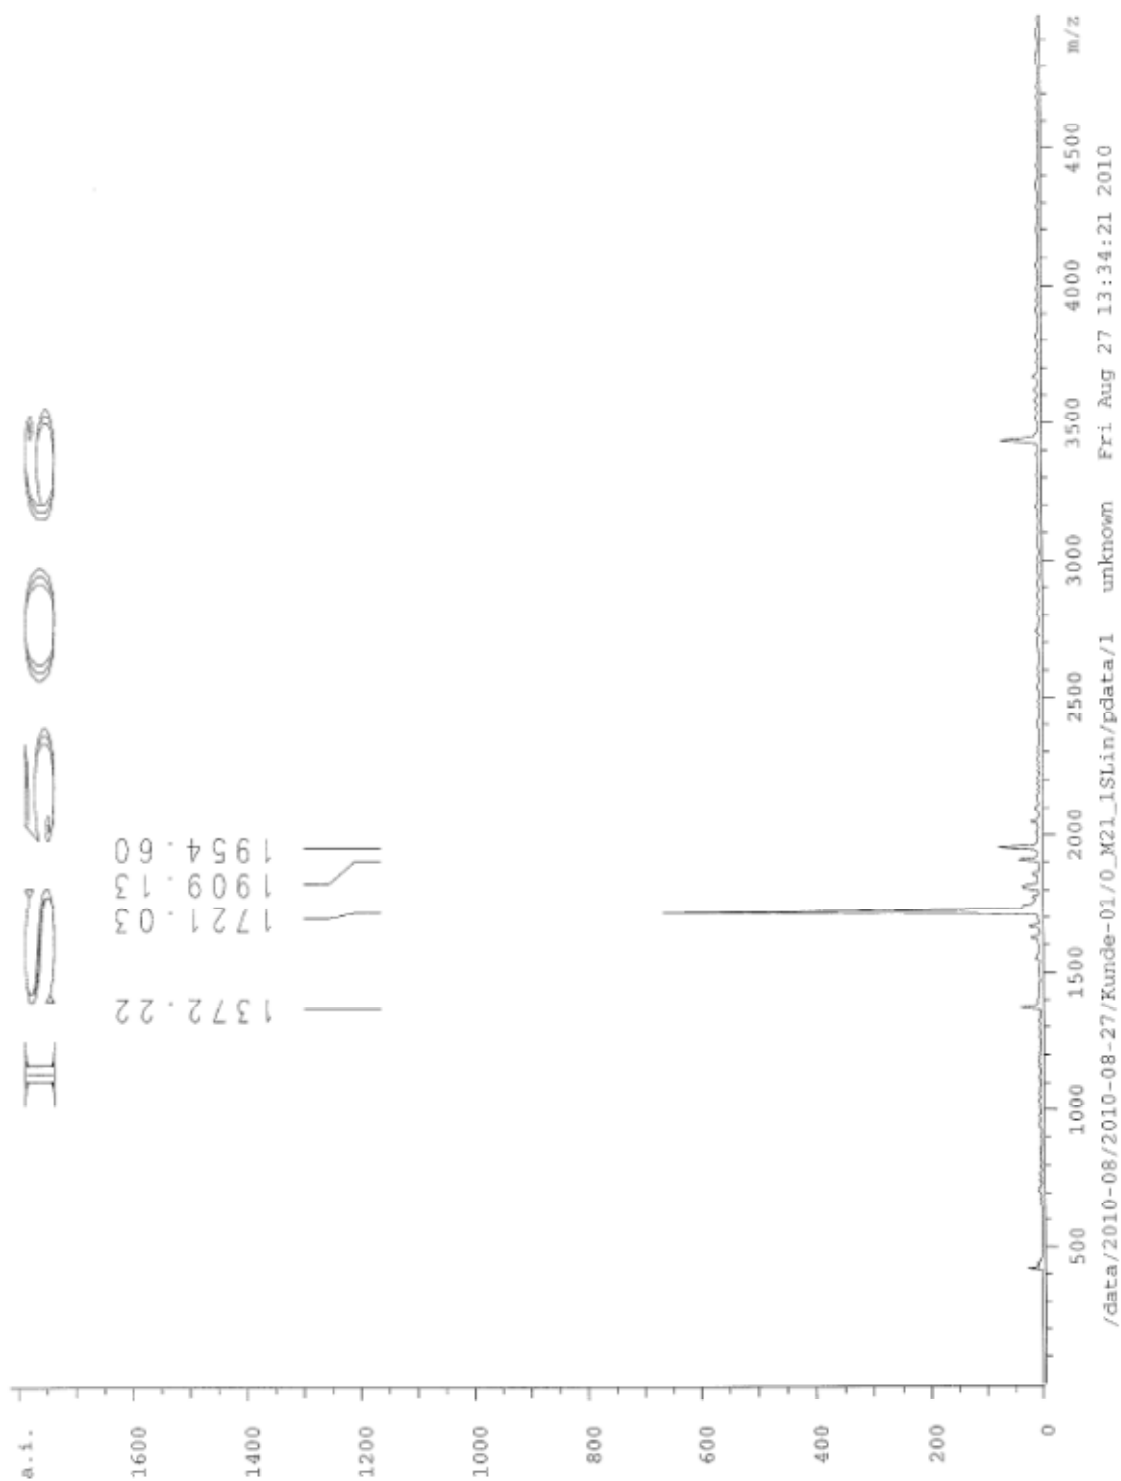

MALDI TOF MS of crude **33d** (U<sub>4</sub>-pyrene isoxazole RNA-conjugate)

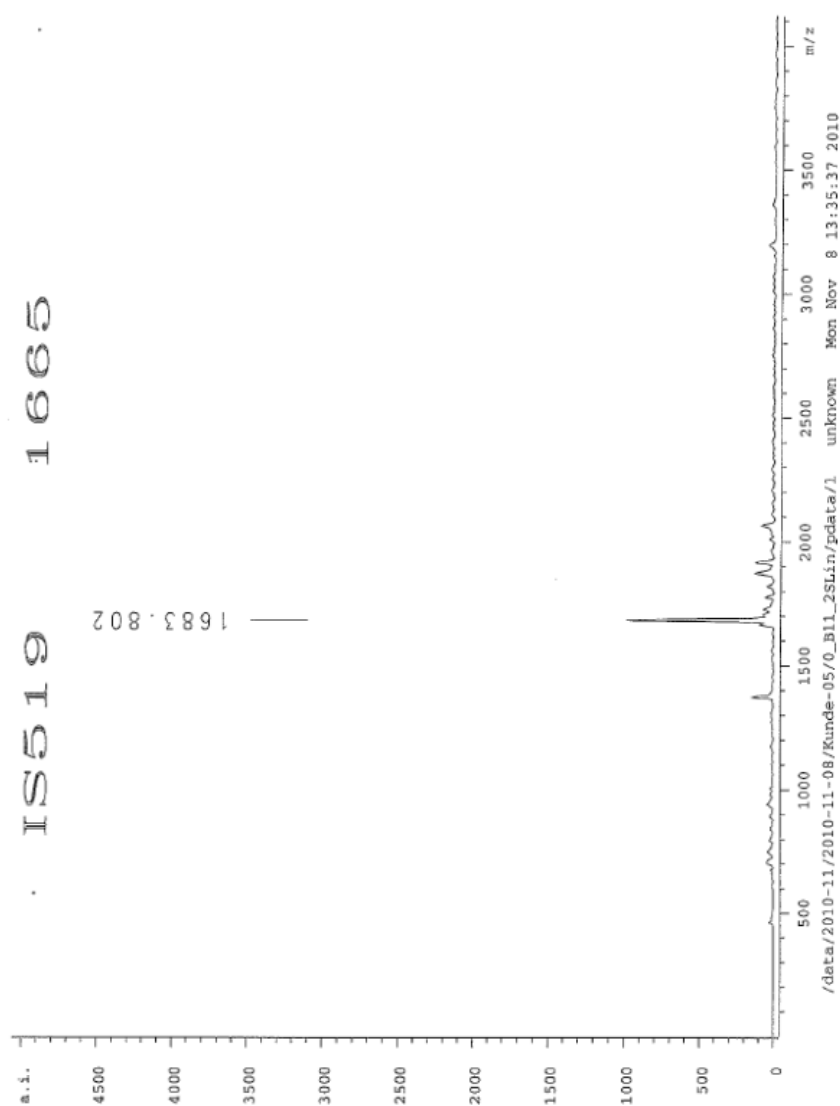

MALDI TOF MS of crude **33e** ( $U_4$ -coumarinyl isoxazole RNA-conjugate)

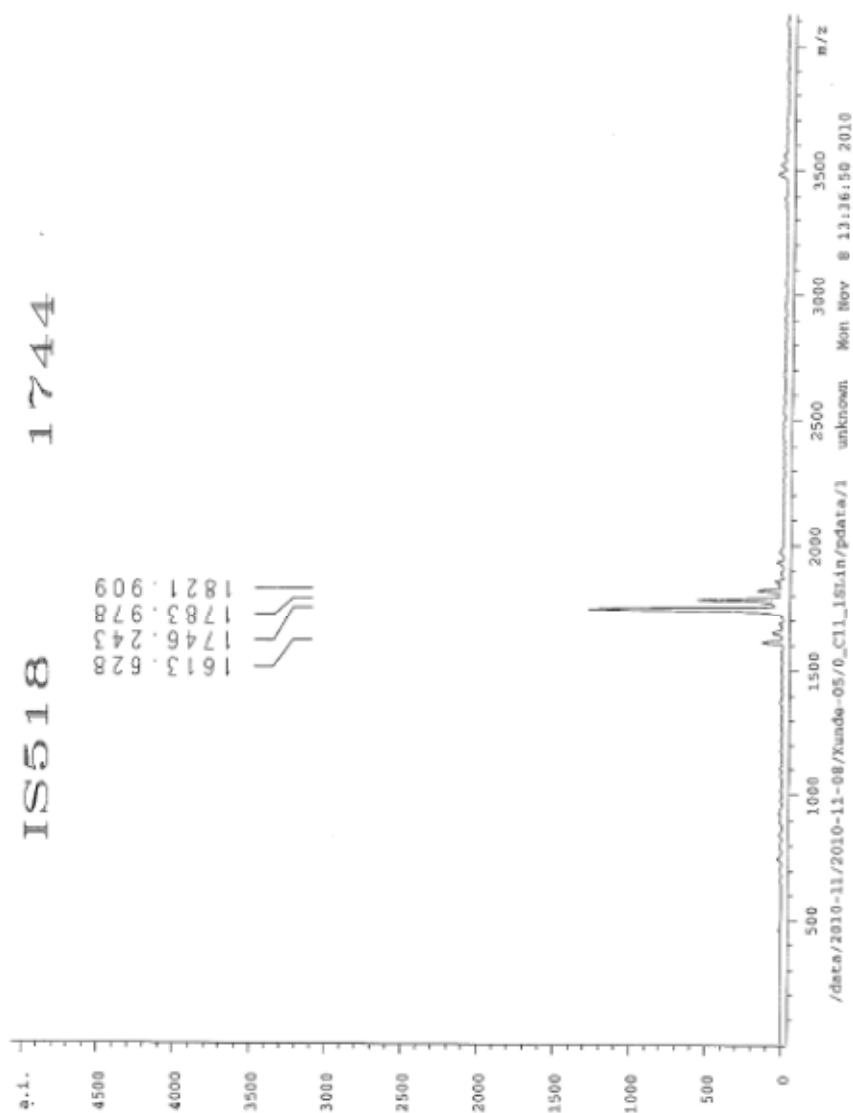

MALDI TOF MS of crude **33f** ( $U_4$ -dabcyI isoxazole RNA-conjugate)

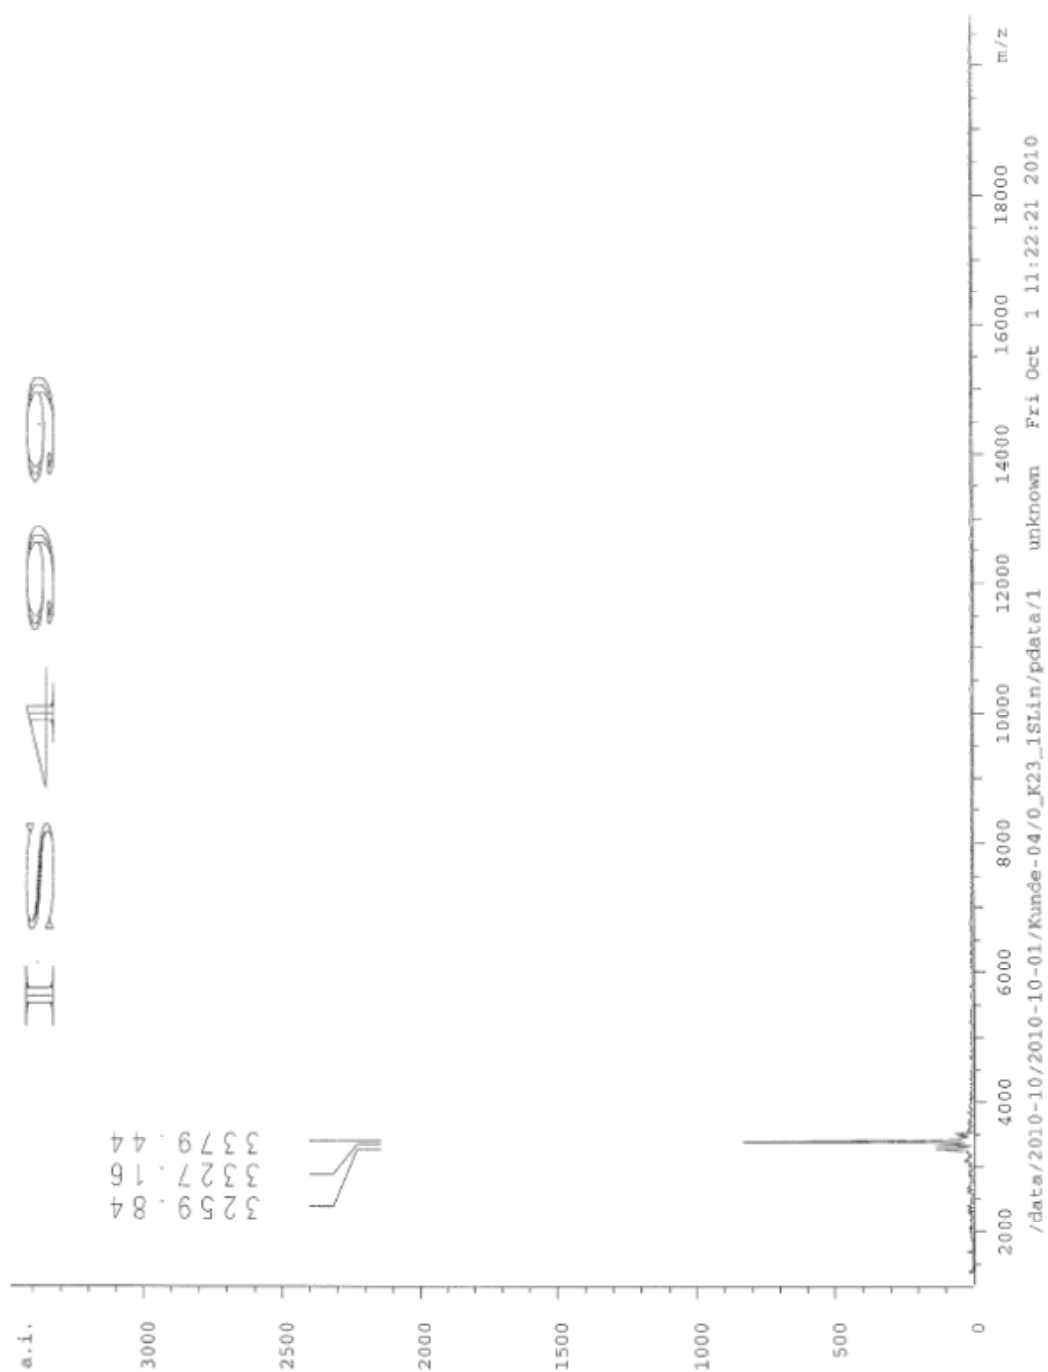

MALDI TOF MS of crude **34a** (9-mer RNA phenyl isoxazole conjugate)

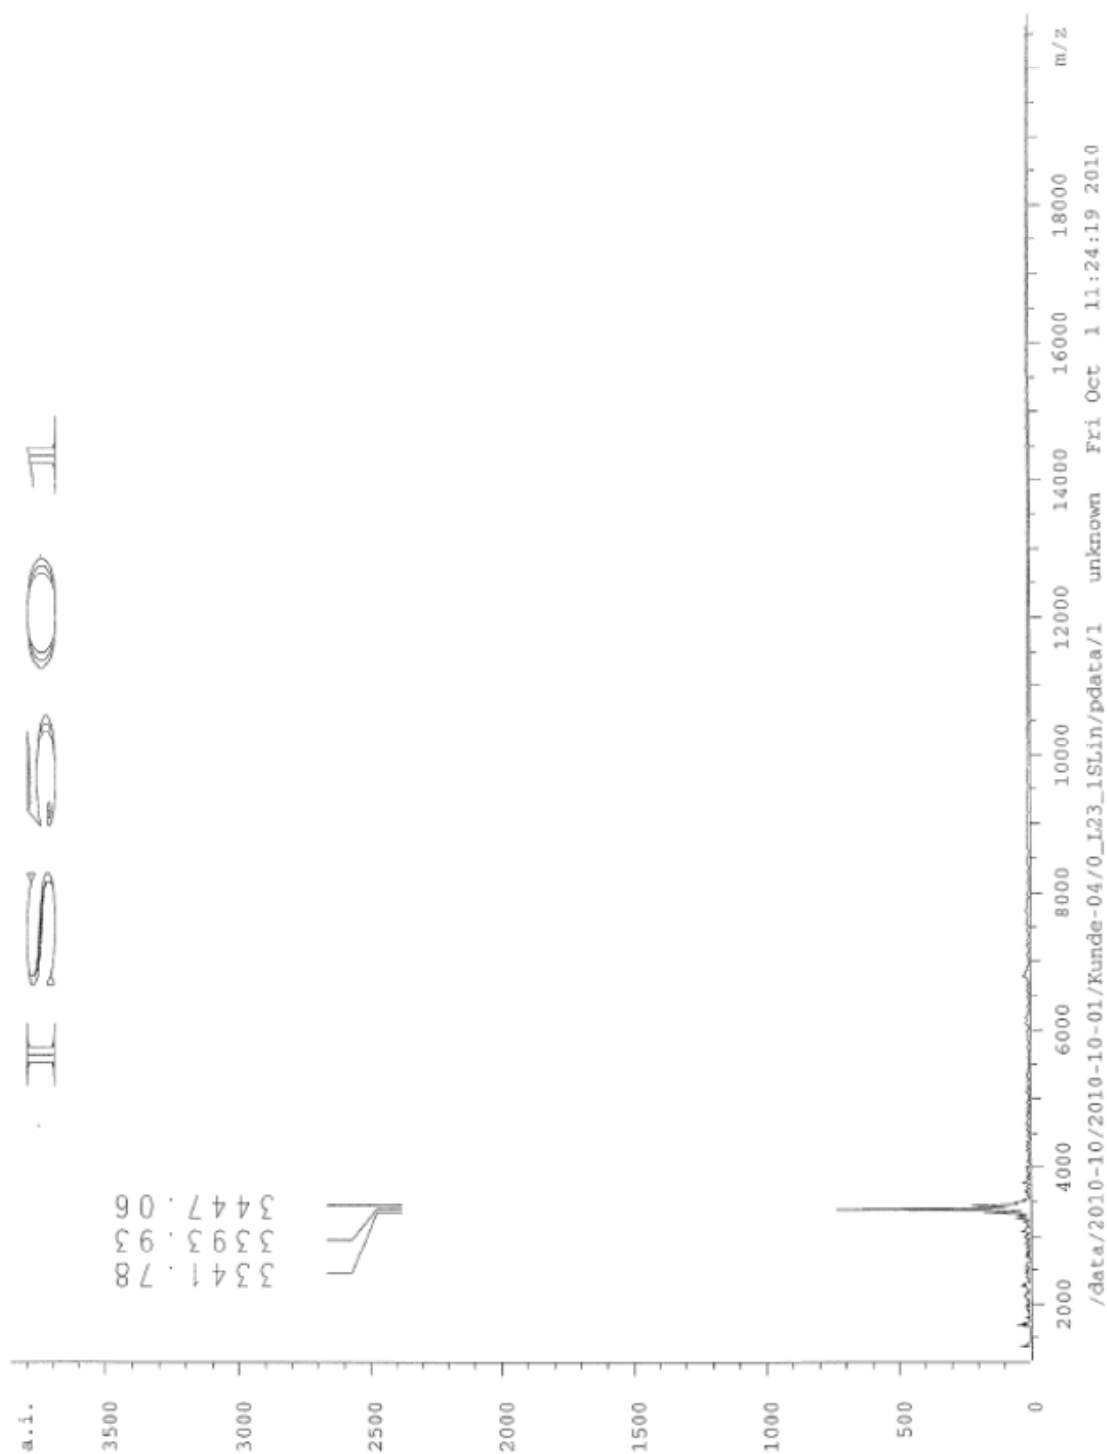

MALDI TOF MS of crude **34b** (9-mer RNA 2-fluorophenyl isoxazole conjugate)

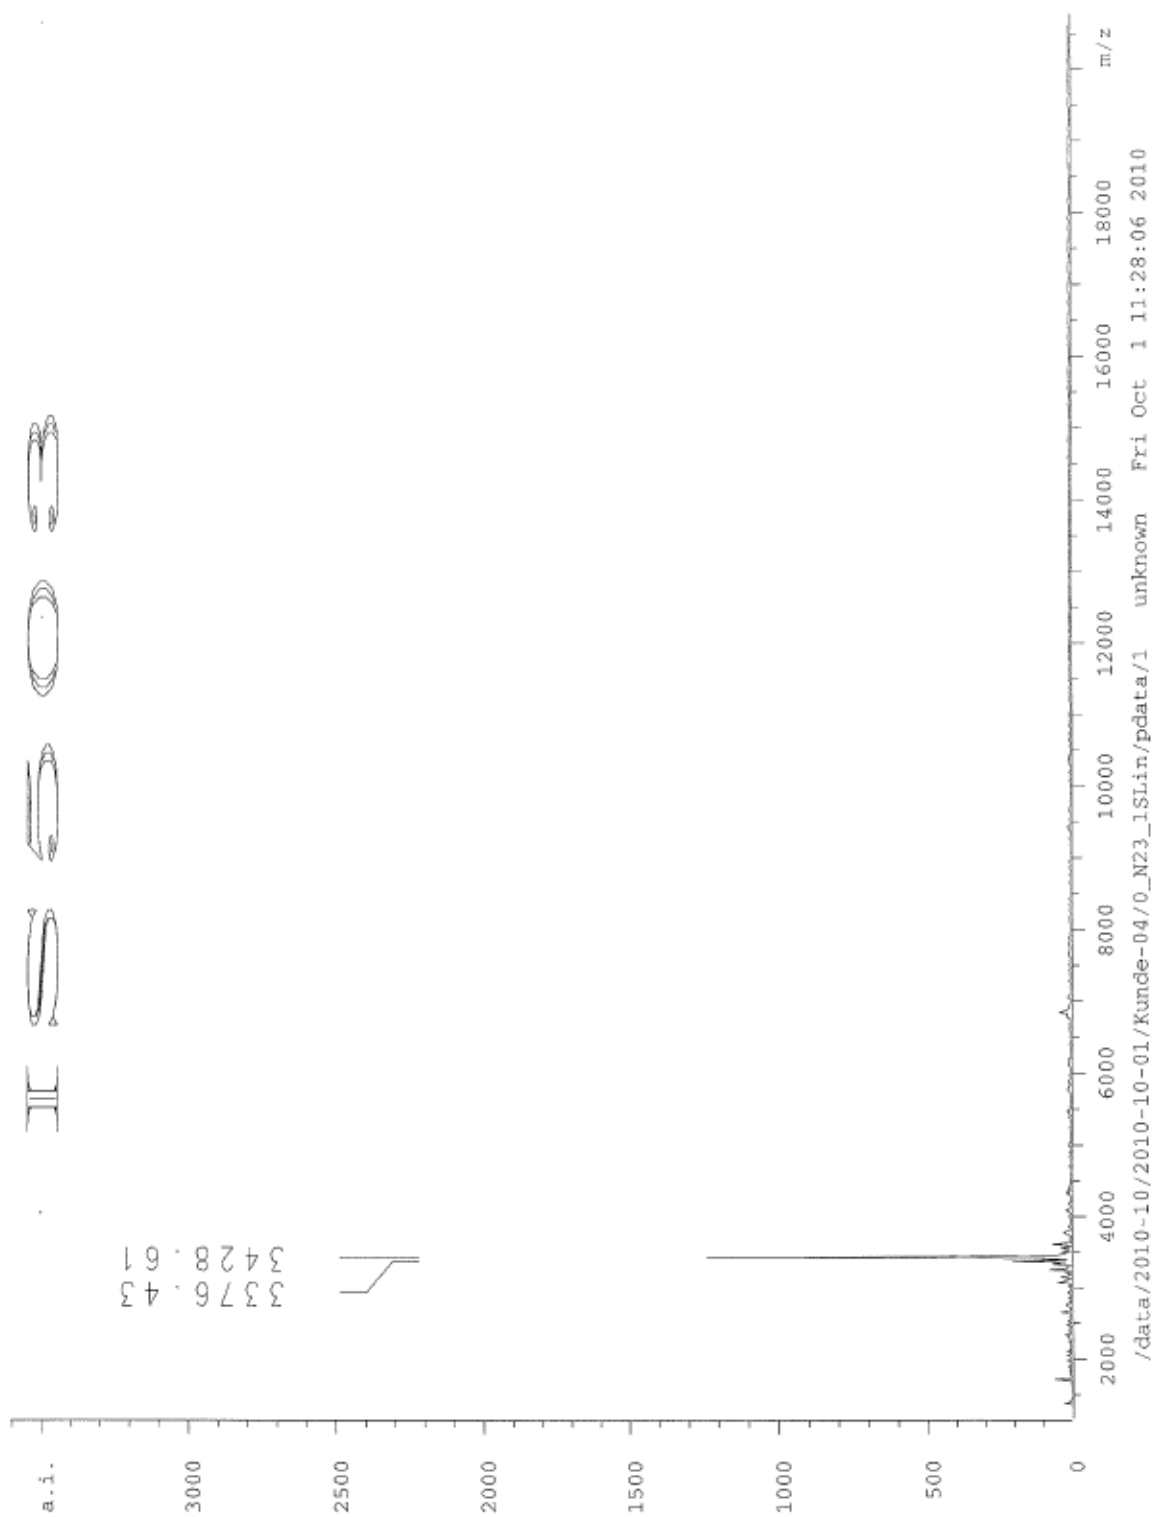

MALDI TOF MS of crude **34c** (9-mer RNA naphthyl isoxazole conjugate)

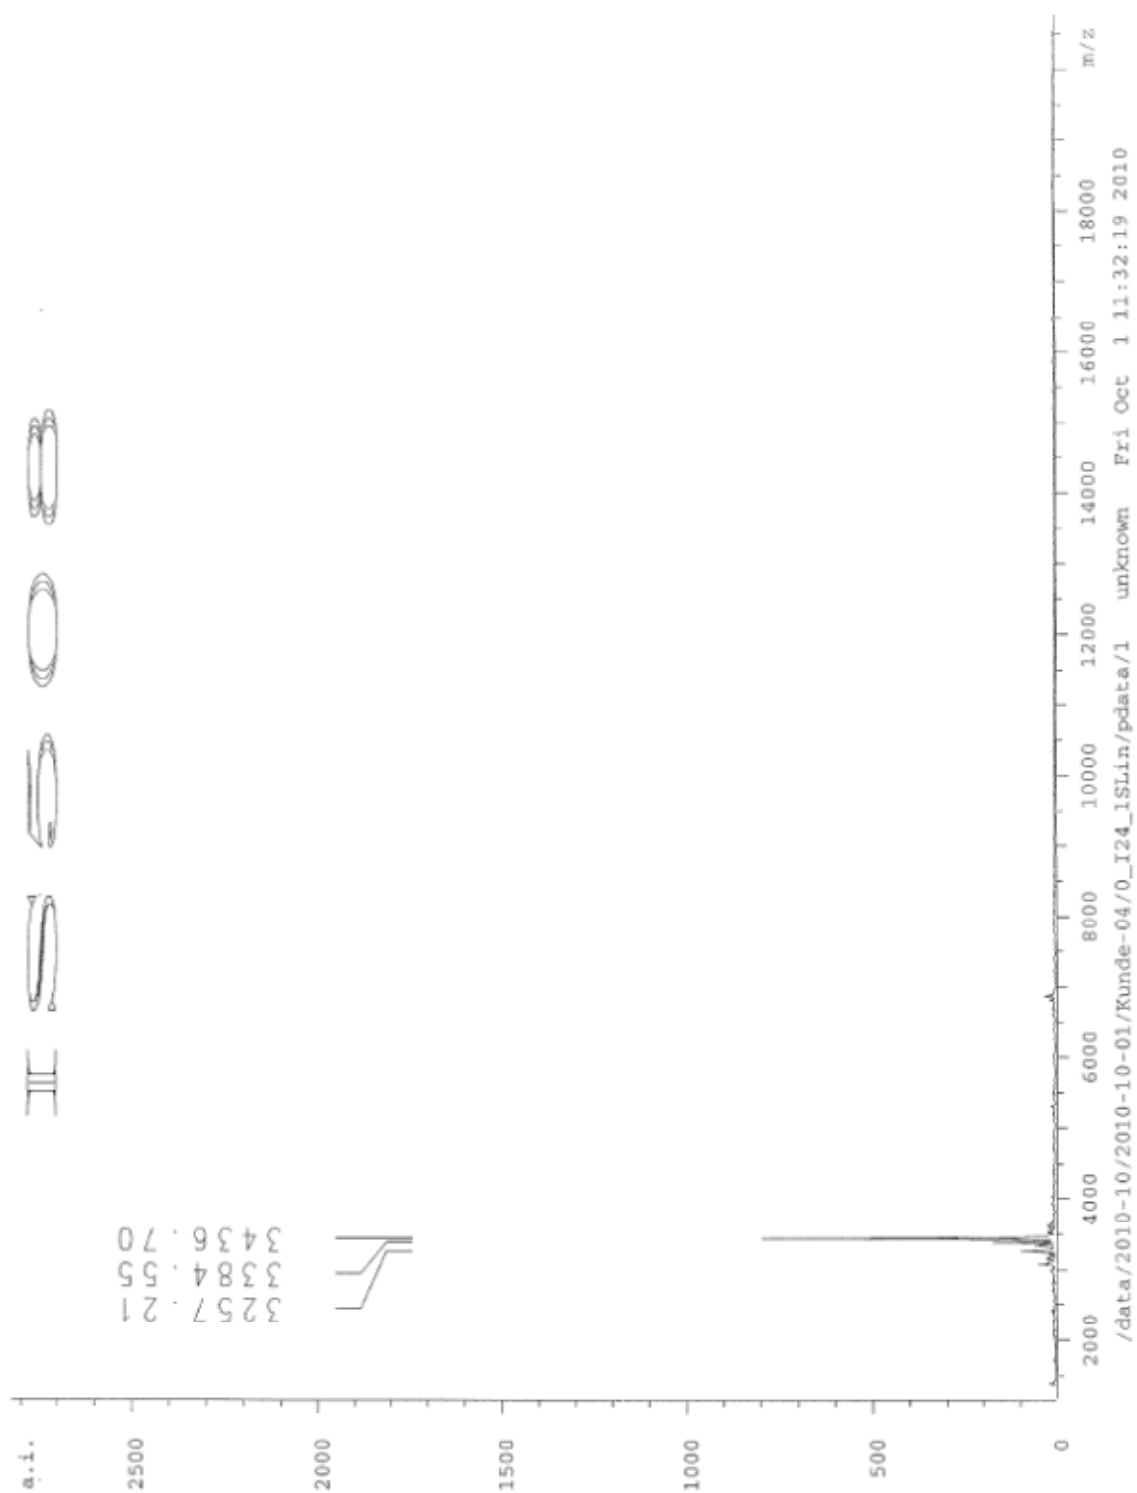

MALDI TOF MS of crude **34d** (9-mer RNA 2-(2-hydroxyethoxy)phenyl isoxazole conjugate)



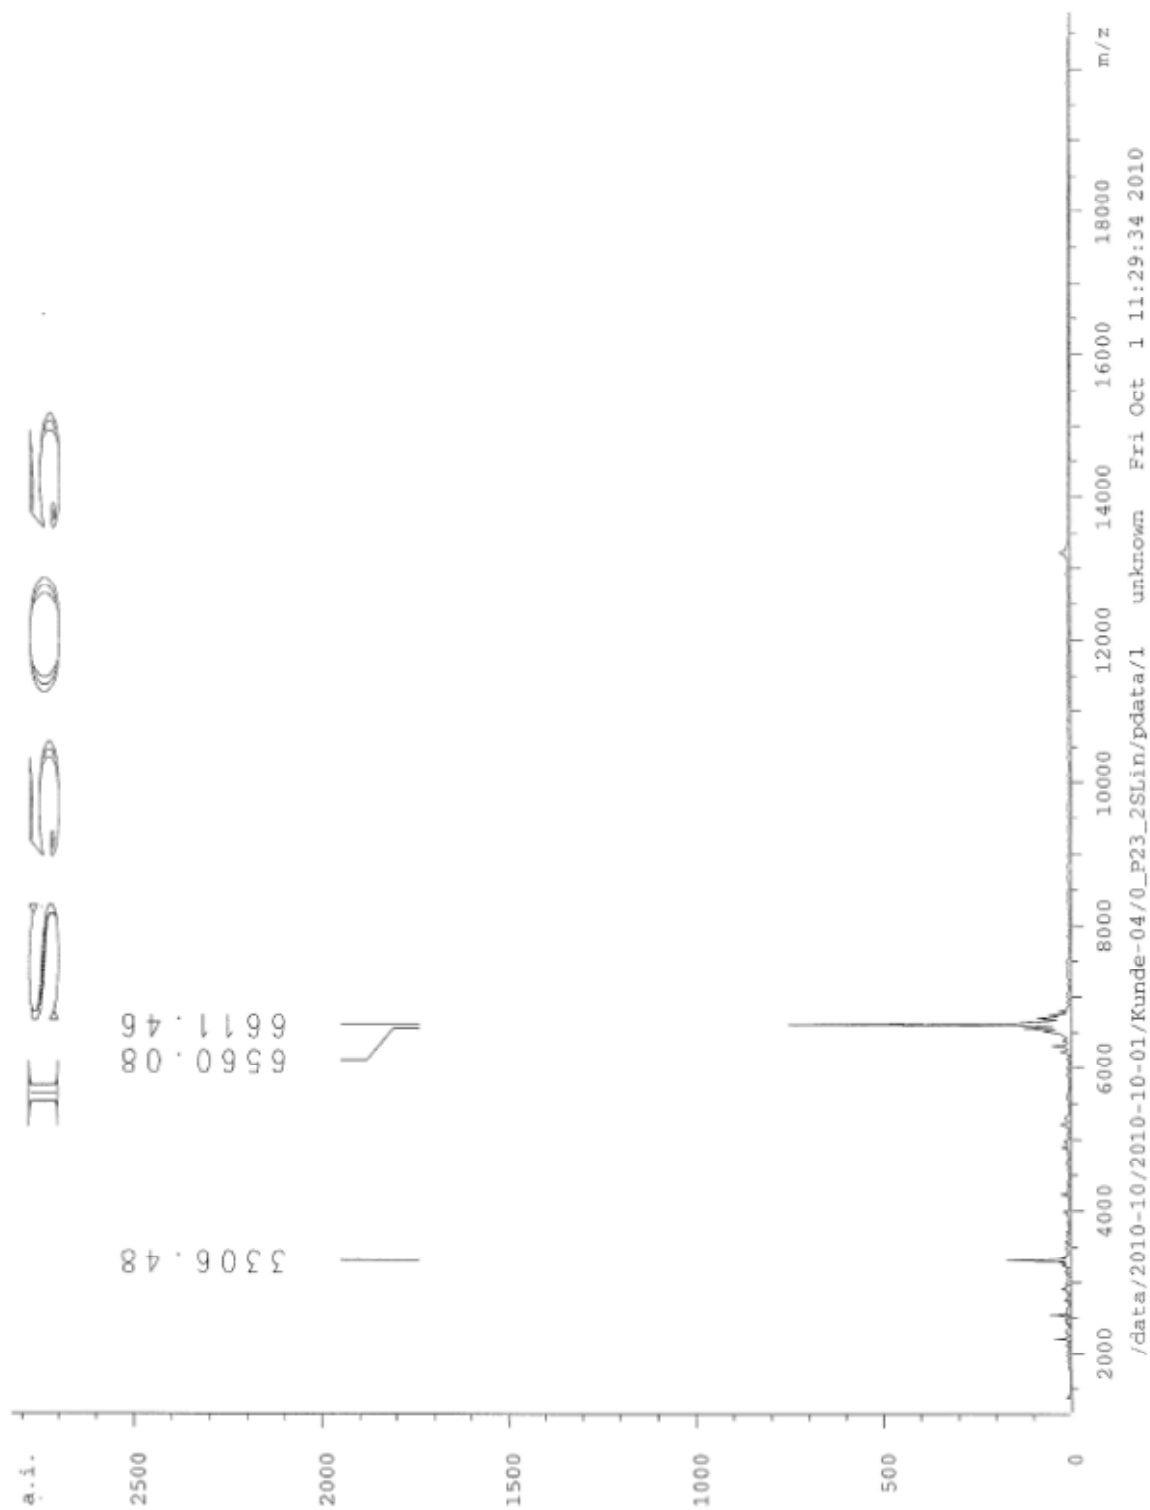

MALDI TOF MS of crude **38** (19-mer RNA phenyl isoxazole conjugate)

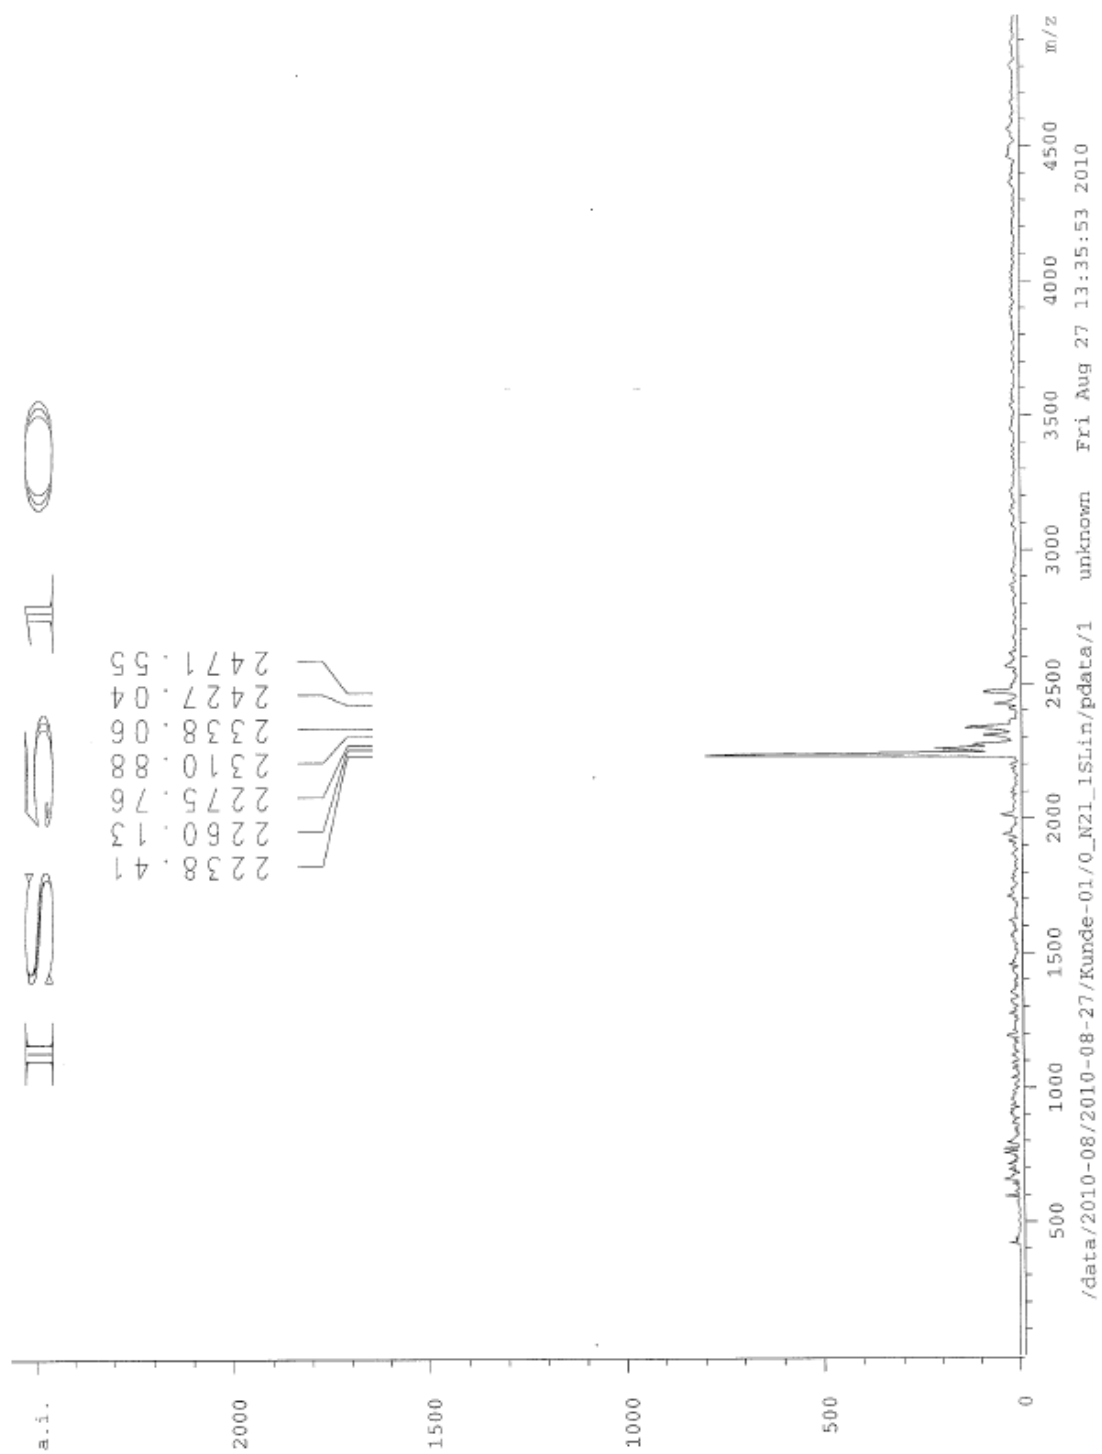

MALDI TOF MS of crude **39** (U<sub>4</sub>-alternate phenyl isoxazole RNA-conjugate)

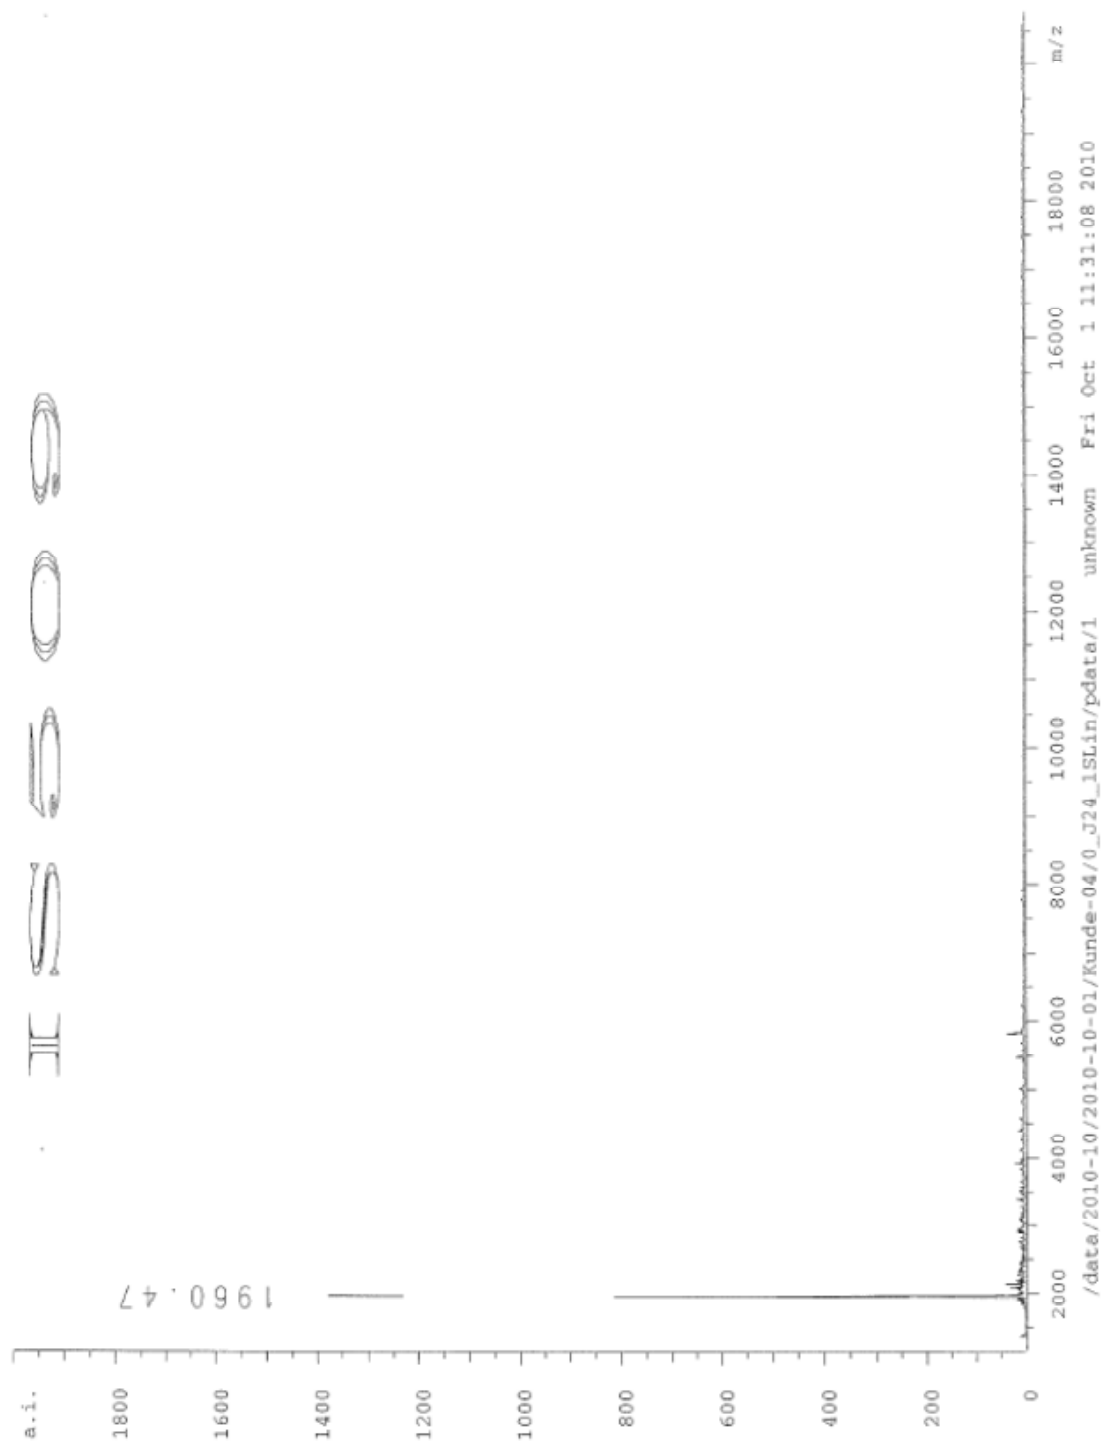

MALDI TOF MS of crude **40** (gapmer phenyl isoxazole RNA-conjugate)

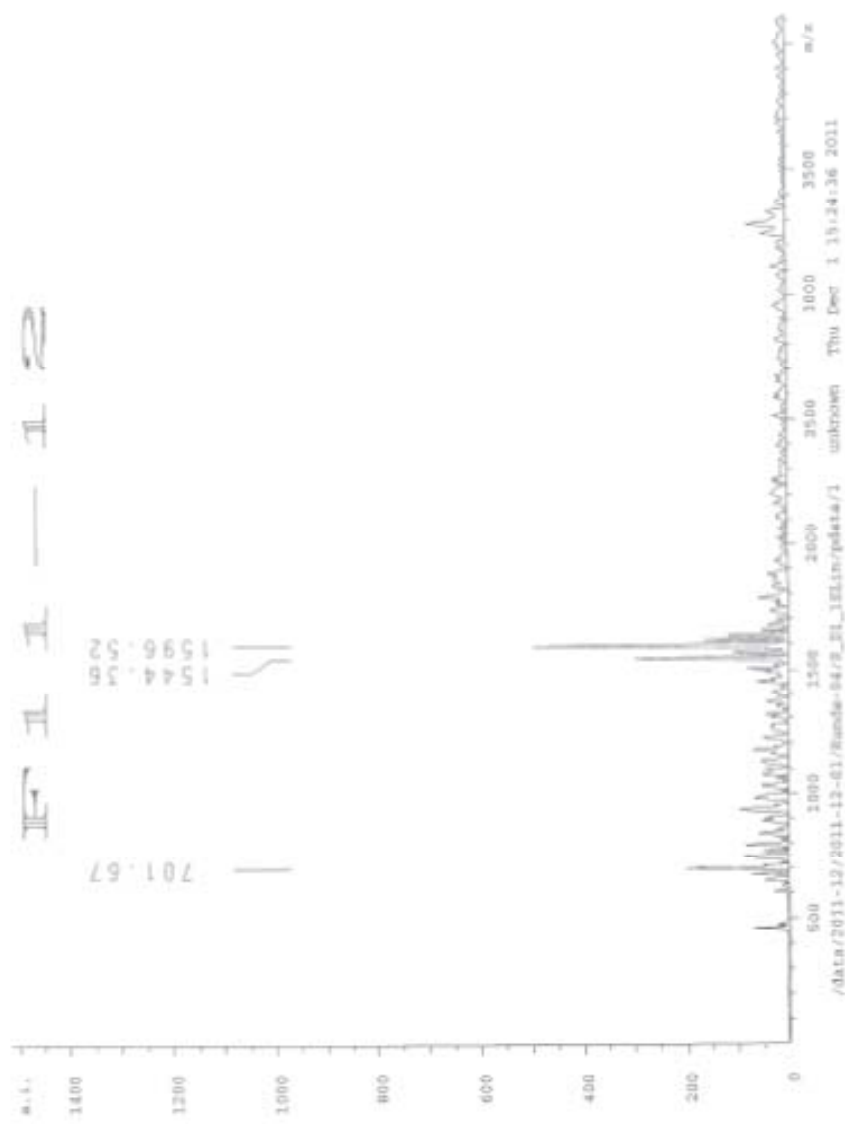

MALDI TOF MS of crude **23f** (U<sub>4</sub>-phenyl triazole RNA-conjugate)
